# Supplementary material for: One-pot synthesis of new alkyl 1-naphthoates bearing quinoline, pyranone and cyclohexenone moieties via metal-free sequential addition/oxidation reactions
Source: Royal Society of Chemistry journal article supplement (doi:10.1039/d1ra07092d), 2021-01-01

# Supporting information

## **One-pot Synthesis of New Alkyl 1-Naphthoates Bearing Quinoline, Pyranone and Cyclohexenone Moieties *via* the Metal-free Sequential Addition/Oxidation Reactions**

Seyedeh Hekmat Mousavi, Mohammad Reza Mohammadizadeh,<sup>a</sup> Samira Poorsadeghi,<sup>b</sup> Satoru

Arimitsu,<sup>b</sup> Fatemeh Mohammadsaleh,<sup>a\*</sup> Genta Kojya,<sup>c</sup> Shinichi Gima<sup>c</sup>

<sup>a</sup>Department of Chemistry, Faculty of Nano and Bioscience and Technology, Persian Gulf University, Bushehr 75169, (Islamic Republic of Iran), Fax: +98 7731 223348, E-mail: *f.mohammadsaleh@gmail.com*.

<sup>b</sup>Department of Chemistry, Biology and Marine Science, Faculty of Science, university of the Ryukyus, 1-Senbaru, Nishihara, Nakagami, Okinawa, Japan, Zip code: 903-0213.

<sup>c</sup>Center for Research Advancement and Collaboration, University of the Ryukyus, Senbaru 1, Nishihara, Okinawa 903-0213, Japan.

## 1. The spectral data for the prepared organic compounds

### Methyl 8-(4-hydroxy-2-oxo-2H-chromene-3-carbonyl)-1-naphthoate (5a)

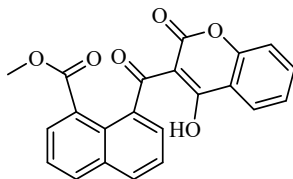

White powder, Mp = 180 °C;  $^1\text{H-NMR}$  (300 MHz,  $\text{CDCl}_3$ )  $\delta$  (ppm): 3.74 (s, 3H,  $\text{OCH}_3$ ), 7.41-7.34 (m, 2H, Ar), 7.58-7.54 (m, 2H, Ar), 7.75-7.69 (m, 2H, Ar), 8.08-8.01 (m, 3H, Ar), 8.14 (dd,  $J_1 = 8$  Hz,  $J_2 = 1.6$  Hz, 1H, Ar), 16.67 (s, 1H, OH);  $^{13}\text{C-NMR}$  (100 MHz,  $\text{CDCl}_3$ )  $\delta$  (ppm): 52.1, 101.1, 115.2, 117.2, 124.4, 125.0, 125.2, 125.4, 126.8, 128.3, 128.5, 130.8, 132.0, 133.3, 134.5, 135.6, 136.0, 155.4, 159.0, 169.4, 178.1, 201.7. HRMS (ESI) calculated for  $\text{C}_{22}\text{H}_{14}\text{O}_6$   $[\text{M}+\text{H}]^+$ : 375.0869; found: 375.0875.

### Ethyl 8-(4-hydroxy-2-oxo-2H-chromene-3-carbonyl)-1-naphthoate (5b)

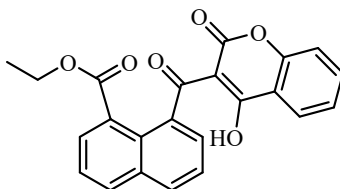

White powder, Mp = 184 °C;  $^1\text{H-NMR}$  (300 MHz,  $\text{CDCl}_3$ )  $\delta$  (ppm): 1.28 (t,  $J = 7.2$  Hz, 3H,  $\text{CH}_3$ ), 4.21 (q,  $J = 7.2$  Hz, 3H,  $\text{OCH}_2$ ), 7.33-7.40 (m, 2H, Ar), 7.58-7.53 (m, 2H, Ar), 7.68-7.74 (m, 2H, Ar), 8.00-8.07 (m, 3H, Ar), 8.13 (d,  $J = 8.0$  Hz, 1H, Ar), 16.73 (s, 1H, OH);  $^{13}\text{C-NMR}$  (100 MHz,  $\text{CDCl}_3$ )  $\delta$  (ppm): 14.2, 61.4, 101.3, 115.3, 117.2, 124.3, 125.0, 125.2, 125.4, 126.8,

128.5, 128.6, 130.6, 132.0, 133.2, 134.5, 135.6, 136.0, 155.4, 159.0, 169.1, 178.0, 201.7. HRMS (ESI) calculated for C<sub>23</sub>H<sub>19</sub>O<sub>6</sub> [M+H]<sup>+</sup>: 389.1025; found: 389.1025.

**Propyl 8-(4-hydroxy-2-oxo-2H-chromene-3-carbonyl)-1-naphthoate (5c)**

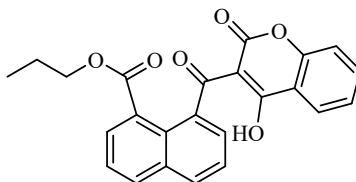

White powder, Mp = 190 °C; <sup>1</sup>H-NMR (300 MHz, CDCl<sub>3</sub>) δ (ppm): 0.94 (t, *J* = 7.2 Hz, 3H, CH<sub>3</sub>), 1.68 (sext, *J* = 7.2 Hz, 2H, CH<sub>2</sub>), 4.12 (t, *J* = 6.8 Hz, 2H, OCH<sub>2</sub>), 7.32-7.40 (m, 2H, Ar), 7.53-7.58 (m, 2H, Ar), 7.67-7.74 (m, 2H, Ar), 7.82 (t, *J* = 7.6 Hz, 1H, Ar), 8.00-8.07 (m, 2H, Ar), 8.13 (dd, *J*<sub>1</sub> = 7.6 Hz, *J*<sub>2</sub> = 1.2 Hz, 1H, Ar), 17.09 (s, 1H, OH); <sup>13</sup>C-NMR (100 MHz, CDCl<sub>3</sub>) δ (ppm): 10.4, 21.9, 67.1, 101.3, 115.3, 117.2, 124.3, 125.0, 125.2, 125.4, 126.8, 128.4, 128.5, 130.5, 131.9, 133.2, 134.5, 135.4, 136.0, 155.3, 159.0, 169.1, 178.1, 201.7.

**Methyl 8-(2,4-dihydroxyquinoline-3-carbonyl)-1-naphthoate (5d)**

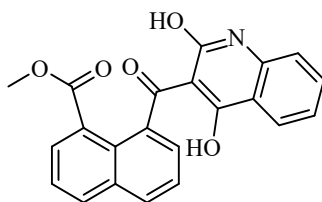

White powder, Mp > 230 °C; <sup>1</sup>H-NMR (400 MHz, CDCl<sub>3</sub>) δ (ppm): 3.64 (s, 3H, OCH<sub>3</sub>), 6.48 (d, *J* = 8.4 Hz, 1H, Ar), 7.19 (t, *J* = 7.6 Hz, 1H, Ar), 7.41 (t, *J* = 8.0 Hz, 1H, Ar), 7.52-7.57 (m, 2H, Ar), 7.68 (d, *J* = 7.2 Hz, 1H, Ar), 7.97 (dd, *J*<sub>1</sub> = 7.2 Hz, *J*<sub>2</sub> = 1.6 Hz, 1H, Ar), 8.03-8.13 (m, 3H, Ar), 11.52 (s, 1H, OH), 15.92 (s, 1H, OH); <sup>13</sup>C-NMR (100 MHz, CDCl<sub>3</sub>) δ (ppm): 51.9, 105.8, 114.6, 116.1, 122.3, 125.0, 125.1, 125.2, 126.9, 128.1, 128.9, 130.4, 130.9, 132.9, 134.3, 134.4,

137.7, 140.7, 162.6, 169.4, 175.5, 201.8. HRMS (ESI) calculated for  $C_{22}H_{15}NO_5$   $[M+H]^+$ : 374.1028; found: 374.0964.

**Ethyl 8-(2,4-dihydroxyquinoline-3-carbonyl)-1-naphthoate (5e)**

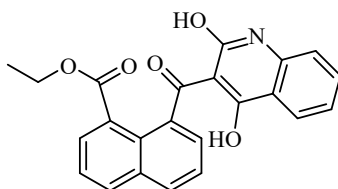

White powder, Mp.>230 °C;  $^1H$ -NMR (300 MHz, DMSO- $d_6$ )  $\delta$  (ppm): 1.07 (t,  $J$  = 6.9 Hz, 3H, CH<sub>3</sub>), 3.90-4.10 (broad peak, 2H, CH<sub>2</sub>), 7.34-7.26 (m, 2H, Ar), 7.62-7.68 (m, 2H, Ar), 7.70-7.75 (m, 2H, Ar), 7.90 (d,  $J_1$  = 6.3 Hz, 1H, Ar), 8.08 (d,  $J_1$  = 8.1 Hz, 1H, Ar), 8.17 (dd,  $J_1$  = 8.2 Hz,  $J_2$  = 1.5 Hz, 1H, Ar), 8.25 (dd,  $J_1$  = 8.0 Hz,  $J_2$  = 1.5 Hz, 1H, Ar), 11.42 (s, 1H, OH), 15.87 (s, 1H, OH);  $^{13}C$ -NMR (100 MHz, DMSO- $d_6$ )  $\delta$  (ppm): 14.0, 61.3, 106.7, 114.0, 116.0, 122.5, 125.2, 125.5, 125.7, 126.6, 128.0, 128.9, 130.1, 131.6, 133.2, 134.2, 135.4, 135.9, 141.8, 160.4, 169.0, 174.7, 201.5.

**Benzyl 8-(2,4-dihydroxyquinoline-3-carbonyl)-1-naphthoate (5f)**

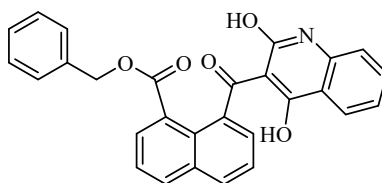

White powder, Mp.>230 °C;  $^1H$ -NMR (400 MHz, CDCl<sub>3</sub>)  $\delta$  (ppm): 5.11 (s, 2H, OCH<sub>2</sub>), 6.52 (d,  $J$  = 6.8 Hz, 1H, Ar), 7.11-7.21 (m, 5H, Ar), 7.44 (t,  $J$  = 8.0 Hz, 1H, Ar), 7.53-7.56 (m, 2H, Ar), 7.65 (d,  $J$  = 4.2 Hz, 1H, Ar), 7.83 (t,  $J$  = 8.0 Hz, 1H, Ar), 8.01-8.04 (m, 2H, Ar), 8.08-8.13 (m, 2H, Ar), 10.51 (s, 1H, OH), 15.89 (s, 1H, OH);  $^{13}C$ -NMR (100 MHz, CDCl<sub>3</sub>)  $\delta$  (ppm): 60.1,

106.0, 114.6, 115.8, 118.9, 122.2, 125.0, 125.1, 125.2, 126.9, 127.5, 128.0, 128.3, 128.8, 130.5, 130.0, 133.1, 133.5, 134.3, 134.4, 135.3, 140.6, 160.6, 169.0, 175.4, 201.8. HRMS (ESI) calculated for C<sub>28</sub>H<sub>19</sub>NO<sub>5</sub> [M+H]<sup>+</sup>: 450.1341; found: 450.1386.

**Methyl 8-(4-hydroxy-6-methyl-2-oxo-2H-pyran-3-carbonyl)-1-naphthoate (5g)**

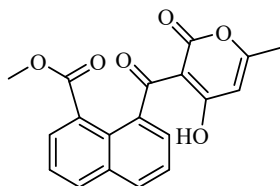

White powder, Mp = 85 °C; <sup>1</sup>H-NMR (400 MHz, CDCl<sub>3</sub>) δ (ppm): 2.31 (s, 3H, CH<sub>3</sub>), 3.77 (s, 3H, OCH<sub>3</sub>), 6.05 (s, 1H, Ar), 7.51-7.56 (m, 2H, Ar), 7.66 (dd, *J*<sub>1</sub> = 7.2 Hz, *J*<sub>2</sub> = 1.2 Hz, 1H, Ar), 7.98-8.05 (m, 3H, Ar), 15.84 (s, 1H, OH); <sup>13</sup>C-NMR (100 MHz, CDCl<sub>3</sub>) δ (ppm): 20.9, 52.0, 99.2, 101.3, 125.0, 125.1, 126.8, 128.4, 128.5, 130.6, 131.8, 133.1, 134.5, 135.6, 160.2, 169.4, 170.0, 181.3, 201.2. HRMS (ESI) calculated for C<sub>19</sub>H<sub>15</sub>O<sub>6</sub> [M+H]<sup>+</sup>: 339.0869; found: 339.0866.

**Ethyl 8-(4-hydroxy-6-methyl-2-oxo-2H-pyran-3-carbonyl)-1-naphthoate (5h)**

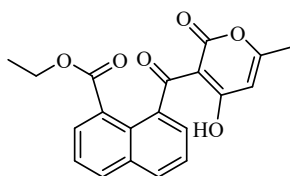

White powder, Mp = 115 °C; <sup>1</sup>H-NMR (400 MHz, CDCl<sub>3</sub>) δ (ppm): 1.33 (t, *J* = 7.2 Hz, 3H, CH<sub>3</sub>-CH<sub>2</sub>), 2.31 (s, 3H, CH<sub>3</sub>), 4.26 (q, *J* = 7.2 Hz, 2H, OCH<sub>2</sub>), 6.04 (s, 1H, Ar), 7.56-7.51 (m, 2H, Ar), 7.65 (d, *J* = 8.0 Hz, 1H, Ar), 8.04-7.98 (m, 3H, Ar), 15.90 (s, 1H, OH); <sup>13</sup>C-NMR (100 MHz, CDCl<sub>3</sub>) δ (ppm): 14.2, 20.9, 61.4, 99.4, 101.3, 125.0, 125.1, 126.8, 128.4, 128.8, 130.4, 131.8, 133.0, 134.5, 135.6, 160.2, 169.1, 169.8, 181.3, 201.2. HRMS (ESI) calculated for C<sub>20</sub>H<sub>17</sub>O<sub>6</sub> [M+H]<sup>+</sup>: 353.1018; found: 353.1028.

**Propyl 8-(4-hydroxy-6-methyl-2-oxo-2H-pyran-3-carbonyl)-1-naphthoate (5i)**

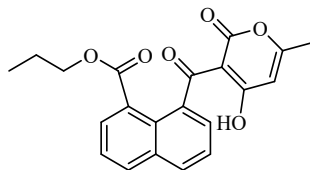

White powder, Mp = 156 °C; <sup>1</sup>H-NMR (400 MHz, CDCl<sub>3</sub>) δ (ppm): 1.01 (t, *J* = 7.2 Hz, 3H, CH<sub>3</sub>-CH<sub>2</sub>), 1.74 (sext, *J* = 7.2 Hz, 2H, CH<sub>2</sub>), 2.30 (s, 1H, CH<sub>3</sub>), 4.16 (t, *J* = 6.8 Hz, 2H, OCH<sub>2</sub>), 6.04 (s, 1H, Ar), 7.56-7.51 (m, 2H, Ar), 7.64 (d, *J* = 7.2 Hz, 1H, Ar), 8.04-7.98 (m, 3H, Ar), 15.92 (s, 1H, OH); <sup>13</sup>C-NMR (100 MHz, CDCl<sub>3</sub>) δ (ppm): 10.5, 20.9, 22.0, 67.0, 99.5, 101.3, 125.0, 125.1, 126.8, 128.4, 128.8, 130.3, 131.8, 133.0, 134.5, 135.6, 160.2, 169.1, 169.8, 181.3, 201.3. HRMS (ESI) calculated for C<sub>21</sub>H<sub>19</sub>O<sub>6</sub> [M+H]<sup>+</sup>: 367.1182; found: 367.1185.

**Butyl 8-(4-hydroxy-6-methyl-2-oxo-2H-pyran-3-carbonyl)-1-naphthoate (5j)**

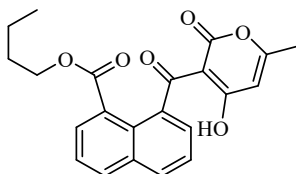

White powder, Mp = 166 °C; <sup>1</sup>H-NMR (400 MHz, CDCl<sub>3</sub>) δ (ppm): 0.95 (t, *J* = 7.6 Hz, 3H, CH<sub>3</sub>-CH<sub>2</sub>), 1.44 (sext, *J* = 8.0 Hz, 2H, CH<sub>2</sub>-CH<sub>3</sub>), 1.69 (pen, *J* = 7.2 Hz, 2H, CH<sub>2</sub>-CH<sub>2</sub>), 2.29 (s, 1H, CH<sub>3</sub>), 4.20 (t, *J* = 6.8 Hz, 2H, OCH<sub>2</sub>), 6.04 (s, 1H, Ar), 7.50-7.55 (m, 2H, Ar), 7.64 (d, *J* = 7.2 Hz, 1H, Ar), 7.97-8.03 (m, 3H, Ar), 15.91 (s, 1H, OH); <sup>13</sup>C-NMR (100 MHz, CDCl<sub>3</sub>) δ (ppm): 13.7, 19.2, 20.8, 30.6, 65.3, 99.5, 101.3, 125.0, 125.1, 126.8, 128.4, 128.8, 130.3, 131.7, 133.0, 134.5, 135.6, 160.2, 169.1, 169.8, 181.3, 201.2. HRMS (ESI) calculated for C<sub>21</sub>H<sub>19</sub>O<sub>6</sub> [M+H]<sup>+</sup>: 381.1321; found: 381.1338.

**Methyl 8-(2-hydroxy-4,4-dimethyl-6-oxocyclohex-1-ene-1-carbonyl)-1-naphthoate (5k)**

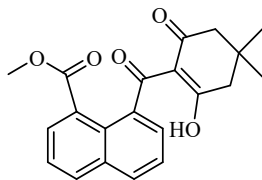

White powder, Mp.>230 °C;  $^1\text{H-NMR}$  (400 MHz,  $\text{CDCl}_3$ )  $\delta$  (ppm): 1.16 (s, 6H,  $\text{CH}_3$ ), 2.38 (s, 2H,  $\text{CH}_2$ ), 2.68 (s, 2H,  $\text{CH}_2$ ), 3.75 (s, 3H,  $\text{OCH}_3$ ), 7.49-7.53 (m, 3H, Ar), 7.93-7.97 (m, 2H, Ar), 8.02 (dd,  $J_1 = 8.0$  Hz,  $J_2 = 1.2$  Hz, 1H, Ar), 17.15 (s, 1H, OH);  $^{13}\text{C-NMR}$  (100 MHz,  $\text{CDCl}_3$ )  $\delta$  (ppm): 28.3, 31.2, 46.2, 51.9, 52.0, 112.4, 124.9, 125.0, 126.8, 128.5, 128.7, 130.4, 131.5, 133.0, 134.3, 135.9, 169.5, 193.3, 195.7, 199.3. HRMS (ESI) calculated for  $\text{C}_{21}\text{H}_{21}\text{O}_5$   $[\text{M}+\text{H}]^+$ : 353.1389; found: 353.1337.

**Butyl 8-(2-hydroxy-4,4-dimethyl-6-oxocyclohex-1-ene-1-carbonyl)-1-naphthoate (5I)**

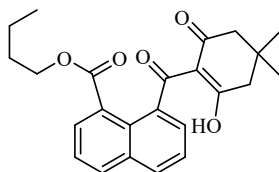

White powder, Mp.>230 °C;  $^1\text{H-NMR}$  (400 MHz,  $\text{CDCl}_3$ )  $\delta$  (ppm): 0.95 (t,  $J = 7.2$  Hz, 3H,  $\text{CH}_3$ - $\text{CH}_2$ ), 1.15 (s, 6H,  $\text{CH}_3$ ), 1.43 (sext,  $J = 7.2$  Hz, 2H,  $\text{CH}_2$ - $\text{CH}_3$ ), 1.70 (pent,  $J = 6.8$  Hz, 2H,  $\text{CH}_2$ - $\text{CH}_2$ ), 2.37 (s, 2H,  $\text{CH}_2$ ), 2.66 (s, 2H,  $\text{CH}_2$ ), 4.18 (t,  $J = 6.8$  Hz, 2H,  $\text{OCH}_2$ ), 7.50-7.46 (m, 3H, Ar), 7.91-7.94 (m, 2H, Ar), 8.00 (dd,  $J_1 = 8.4$  Hz,  $J_2 = 1.2$  Hz, 1H, Ar), 17.22 (s, 1H, OH);  $^{13}\text{C-NMR}$  (100 MHz,  $\text{CDCl}_3$ )  $\delta$  (ppm): 13.7, 19.2, 28.3, 30.6, 31.2, 46.2, 52.0, 65.1, 112.5, 124.9, 125.0, 126.8, 128.4, 129.0, 130.1, 131.3, 132.9, 134.4, 136.0, 169.1, 193.3, 195.7, 199.4. HRMS (ESI) calculated for  $\text{C}_{24}\text{H}_{27}\text{O}_5$   $[\text{M}+\text{H}]^+$ : 395.1858; found: 395.1783.

## 2. The HRMS, <sup>1</sup>HNMR and <sup>13</sup>CNMR spectra of the prepared organic compounds

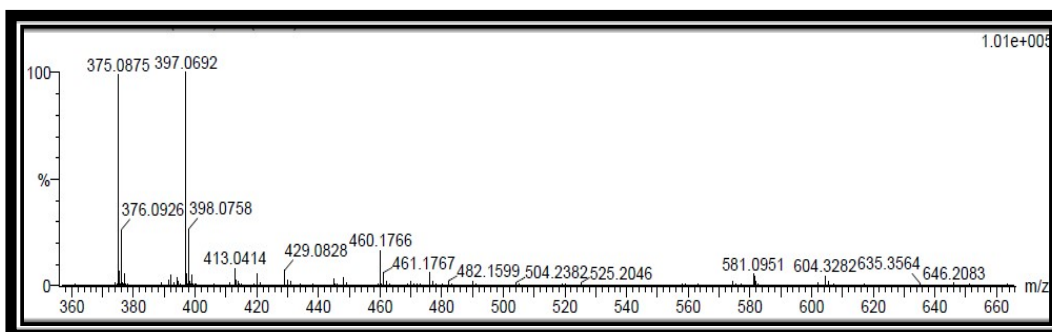

The HRMS spectrum of methyl 8-(4-hydroxy-2-oxo-2*H*-chromene-3-carbonyl)-1-naphthoate  
(**5a**)

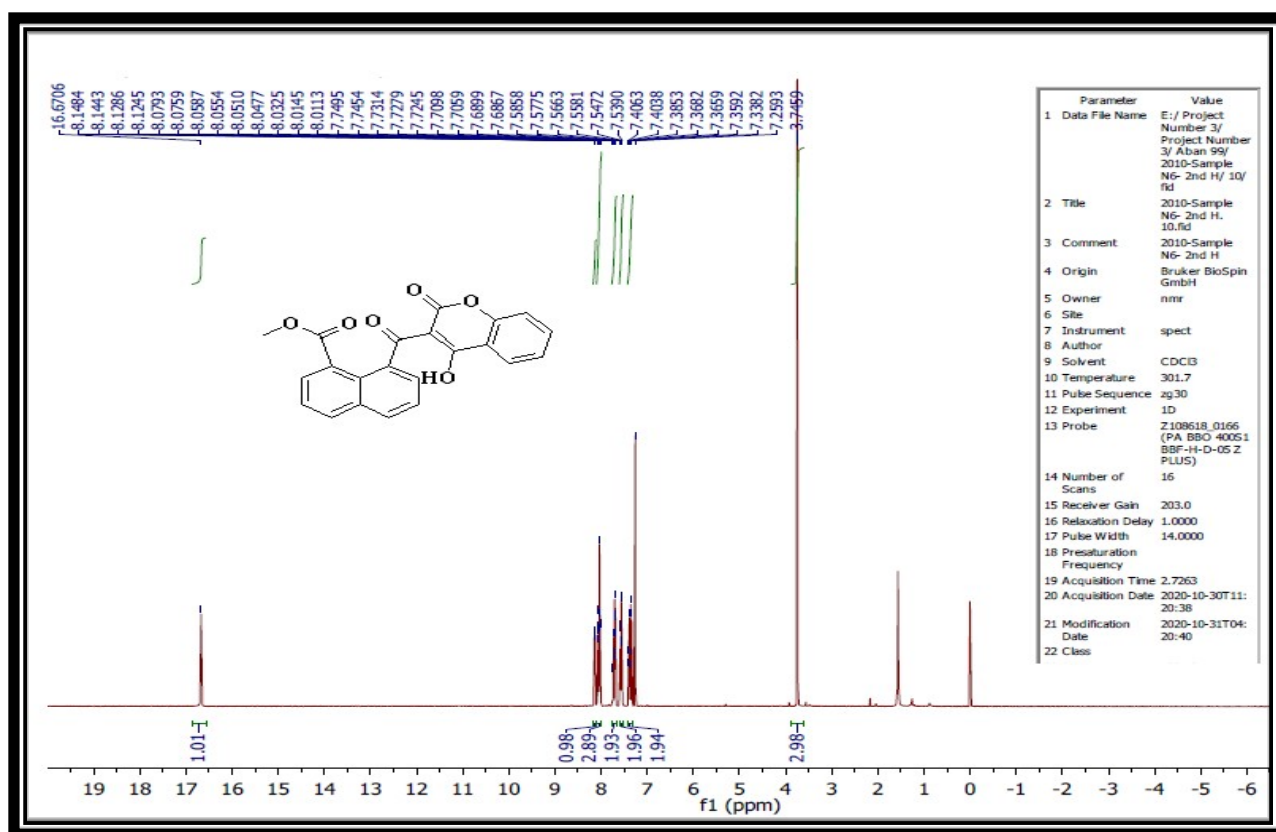

The <sup>1</sup>H NMR spectrum of methyl 8-(4-hydroxy-2-oxo-2*H*-chromene-3-carbonyl)-1-naphthoate  
(**5a**)



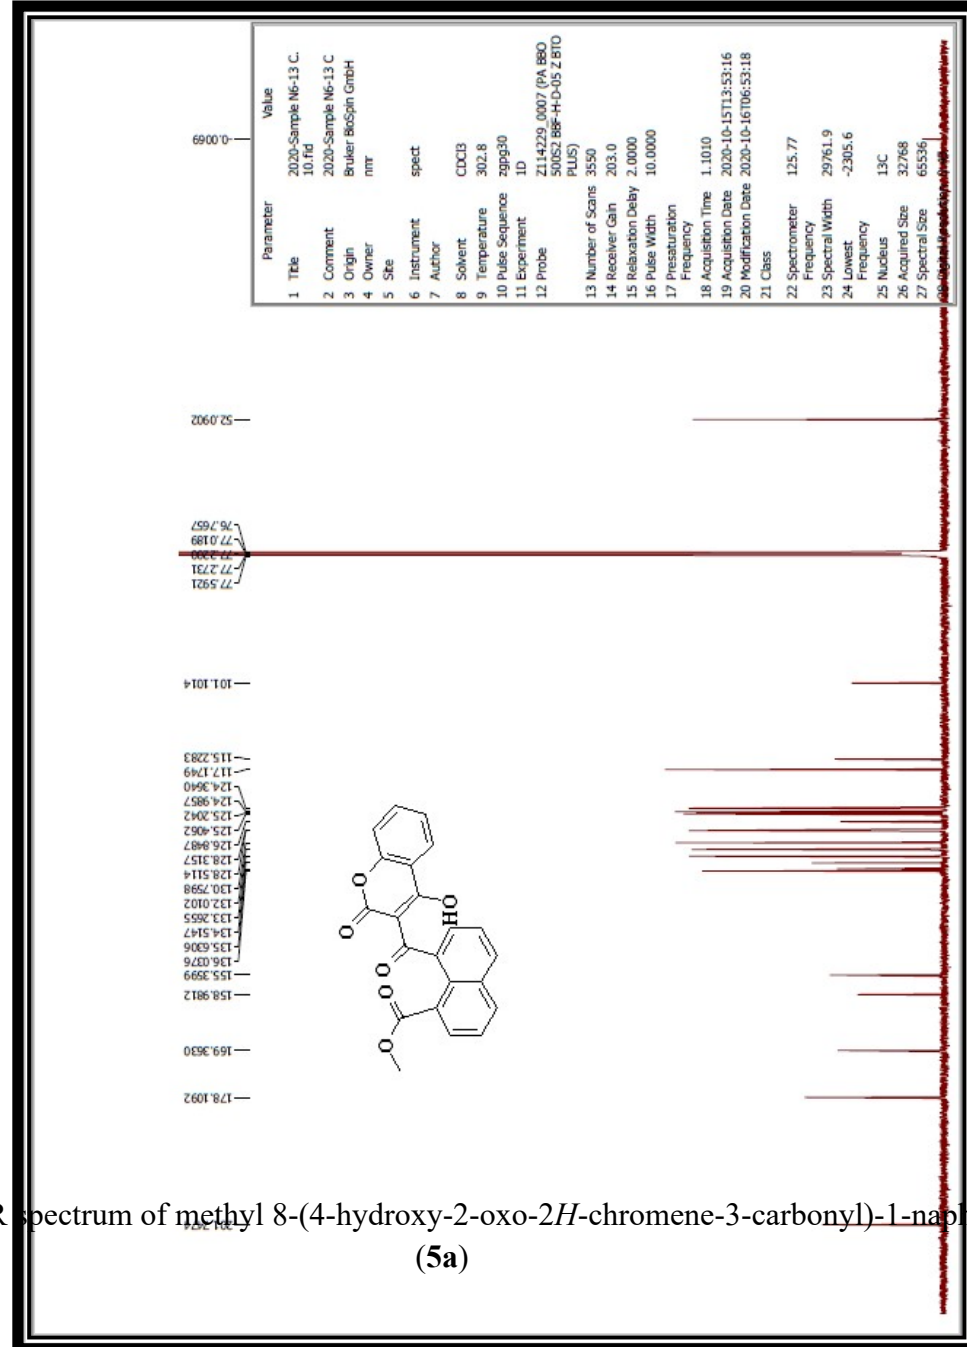

The <sup>13</sup>C-NMR spectrum of methyl 8-(4-hydroxy-2-oxo-2*H*-chromene-3-carbonyl)-1-naphthoate (**5a**)

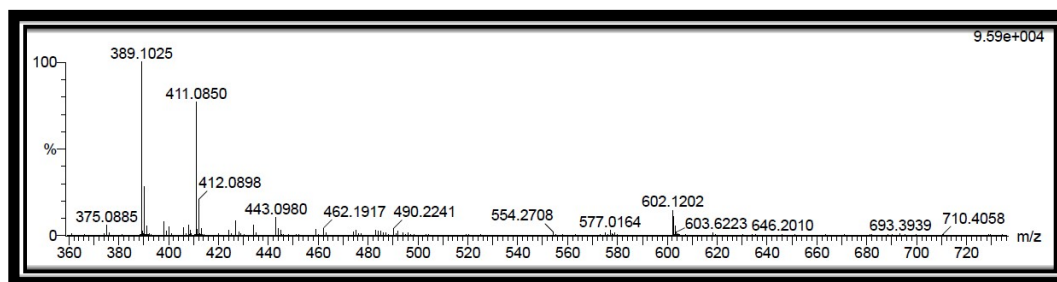

The HRMS spectrum of ethyl 8-(4-hydroxy-2-oxo-2*H*-chromene-3-carbonyl)-1-naphthoate (**5b**)

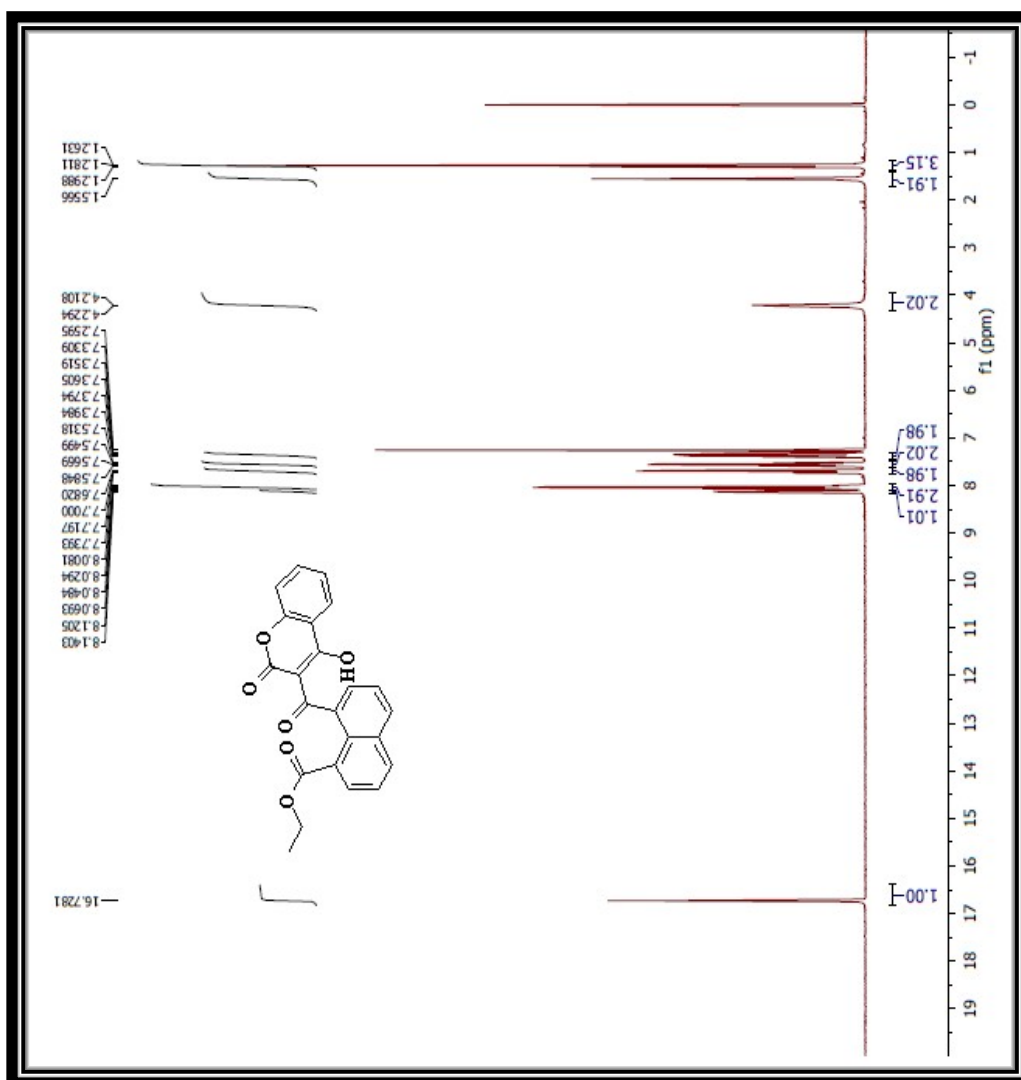

The <sup>1</sup>H NMR spectrum of ethyl 8-(4-hydroxy-2-oxo-2H-chromene-3-carbonyl)-1-naphthoate (**5b**)

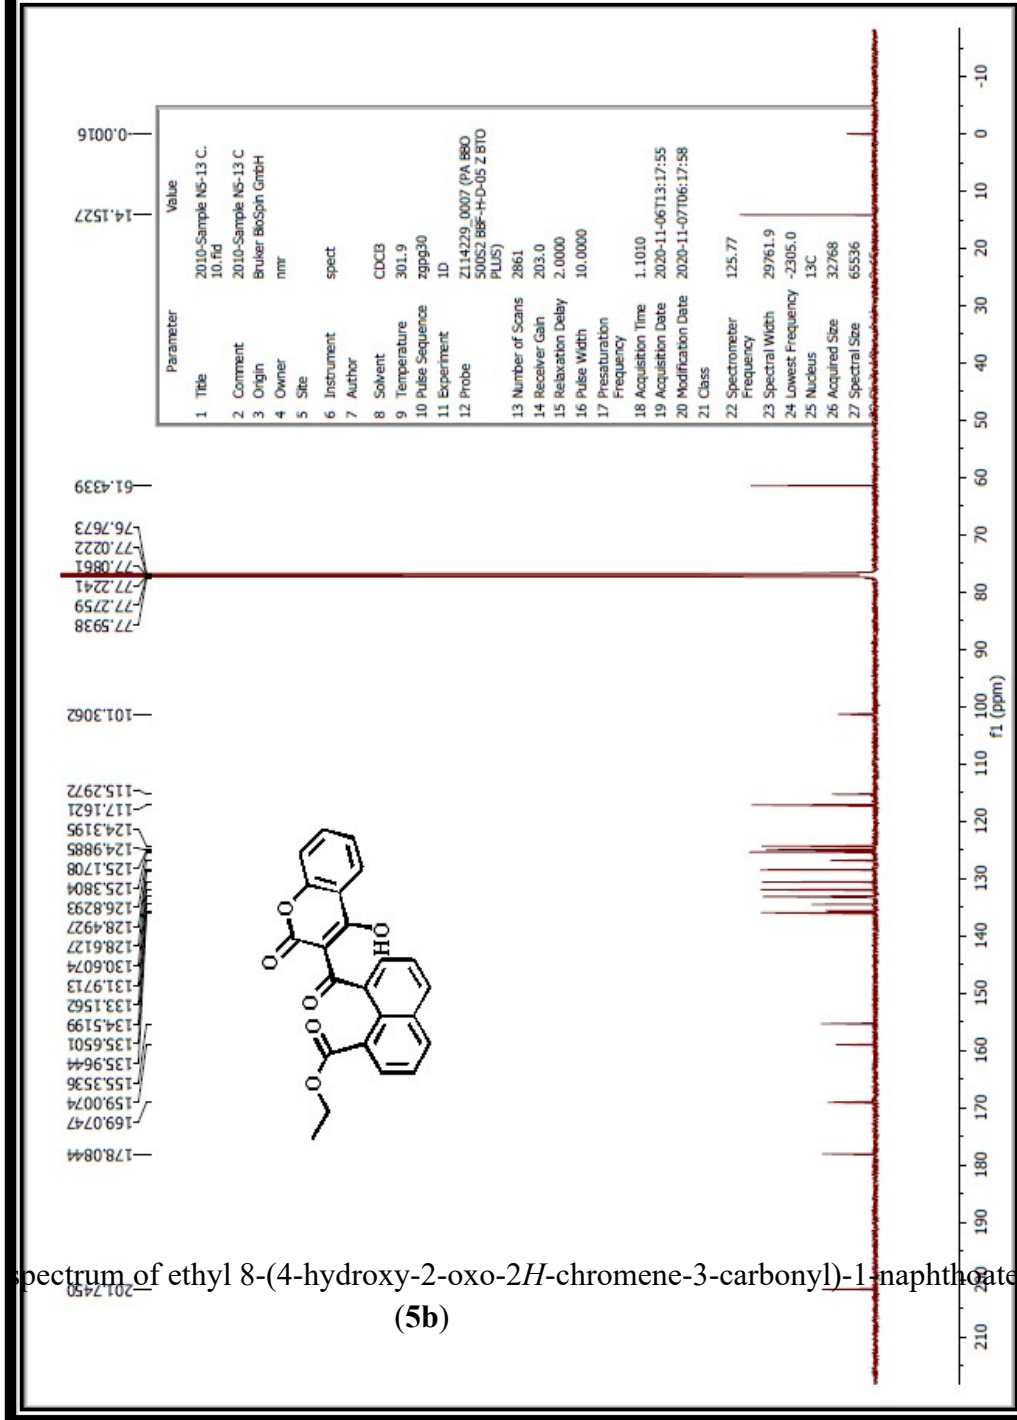

The  $^{13}\text{C}$ -NMR spectrum of ethyl 8-(4-hydroxy-2-oxo-2H-chromene-3-carbonyl)-1-naphthoate (5b)

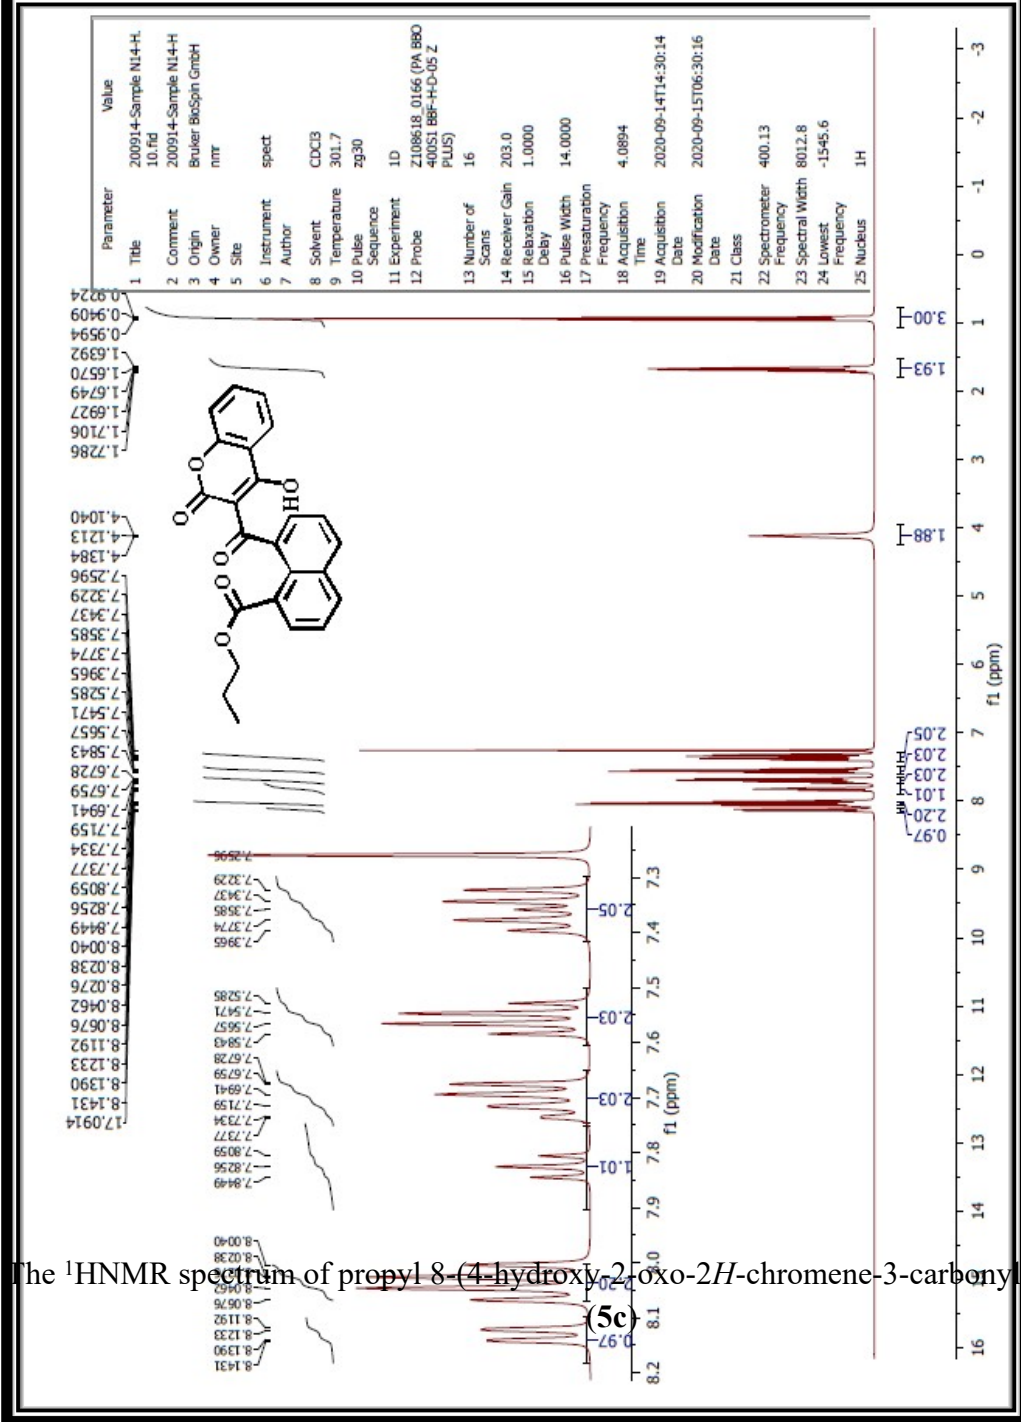

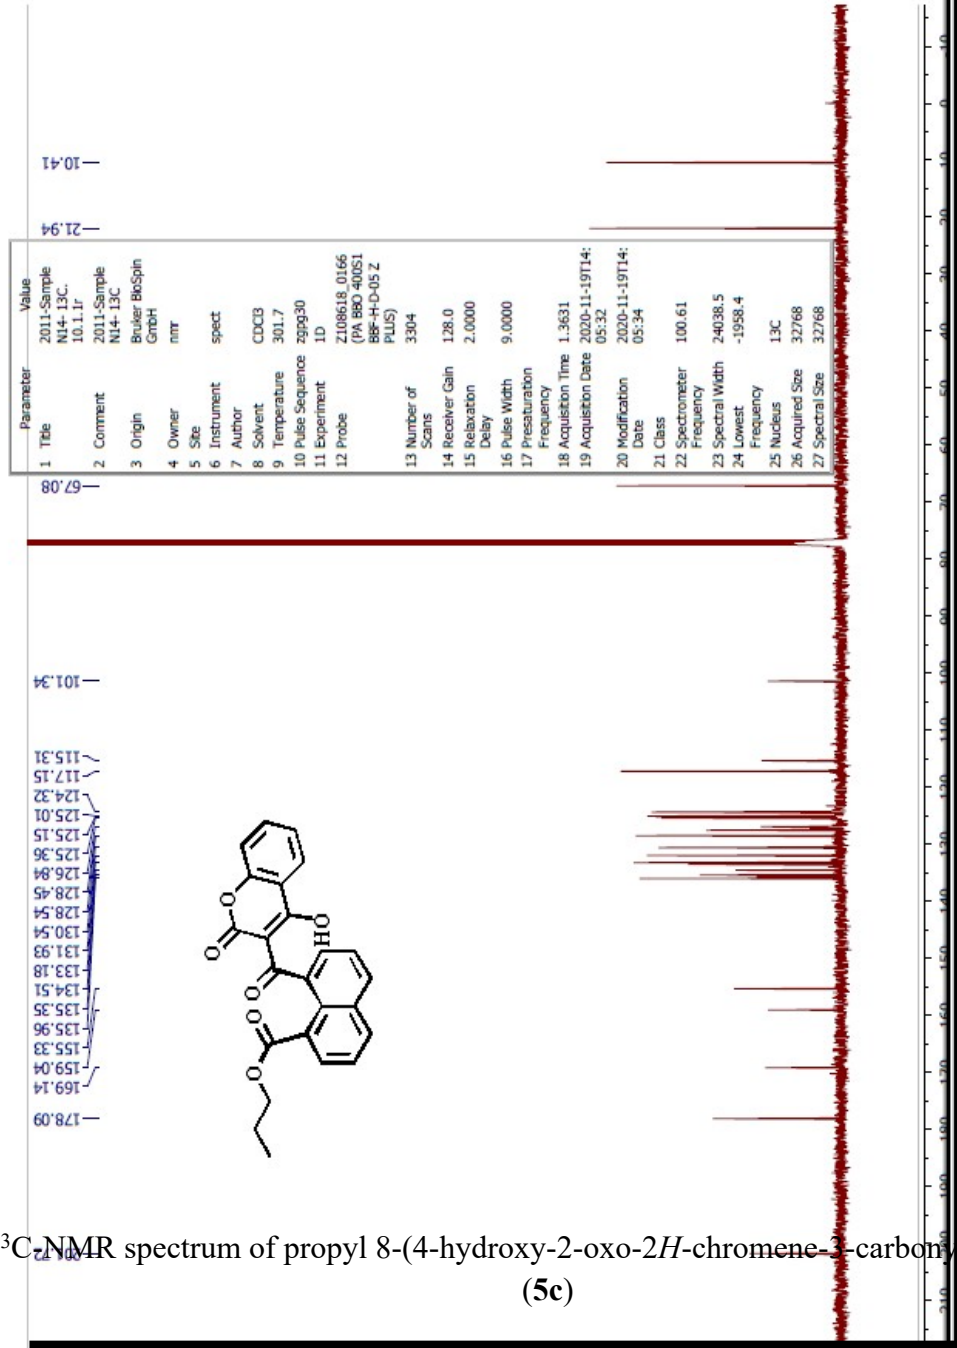

The  $^{13}\text{C}$ -NMR spectrum of propyl 8-(4-hydroxy-2-oxo-2*H*-chromene-3-carbonyl)-1-naphthoate (**5c**)

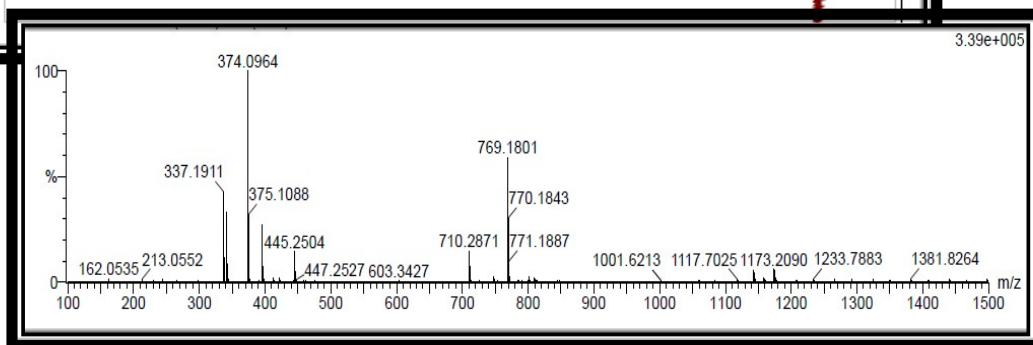

The HRMS spectrum of methyl 8-(2,4-dihydroxyquinoline-3-carbonyl)-1-naphthoate (**5d**)



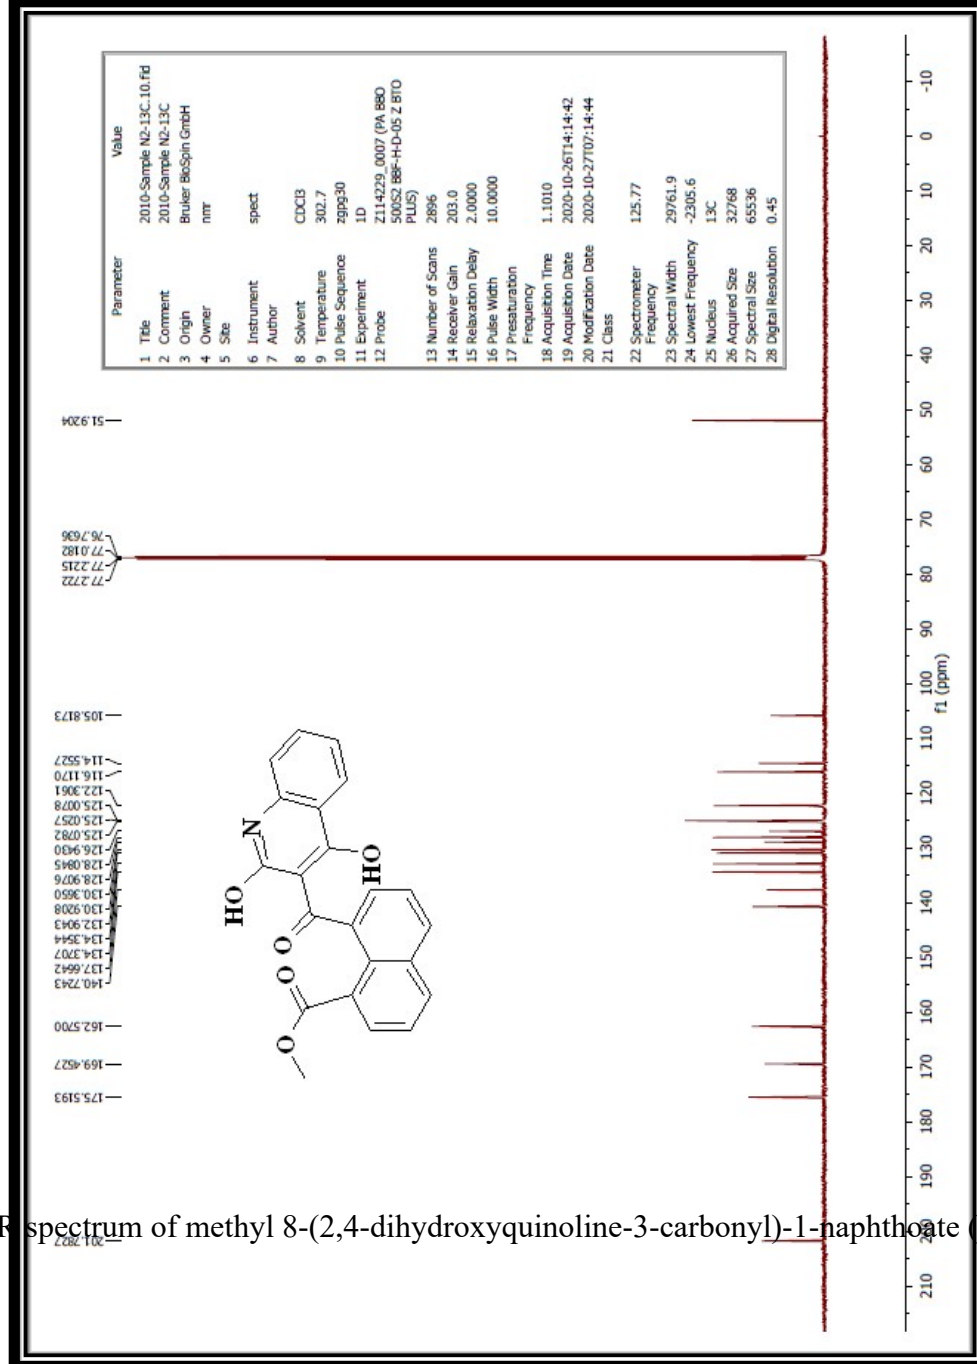

The  $^{13}\text{C}$ NMR spectrum of methyl 8-(2,4-dihydroxyquinoline-3-carbonyl)-1-naphthoate (5d)





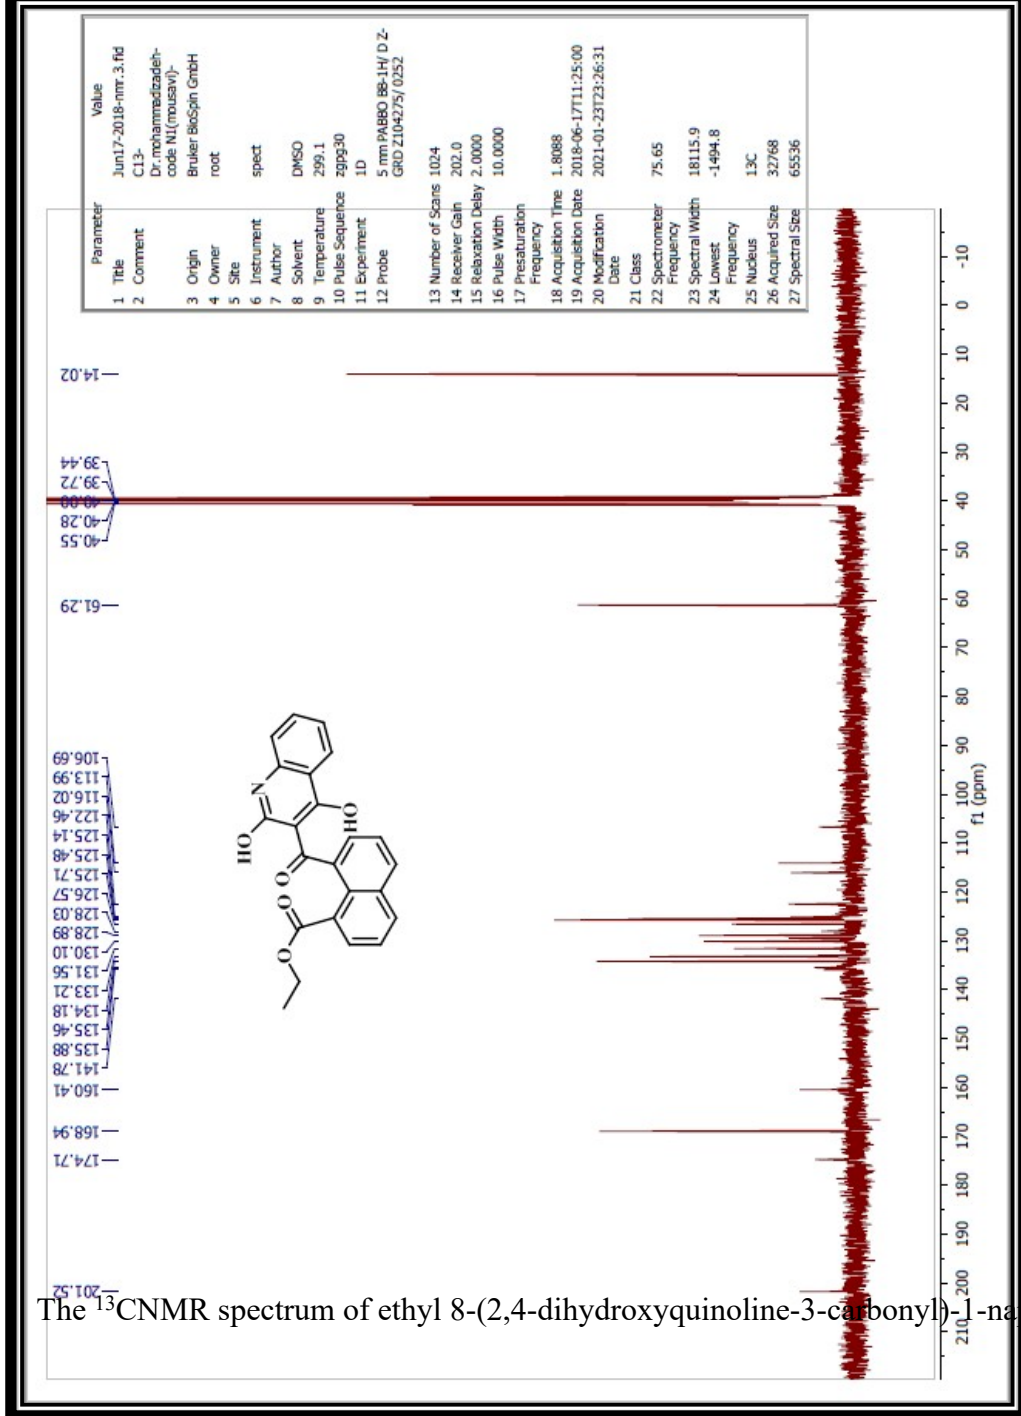

The <sup>13</sup>C NMR spectrum of ethyl 8-(2,4-dihydroxyquinoline-3-carbonyl)-1-naphthoate (**5e**)

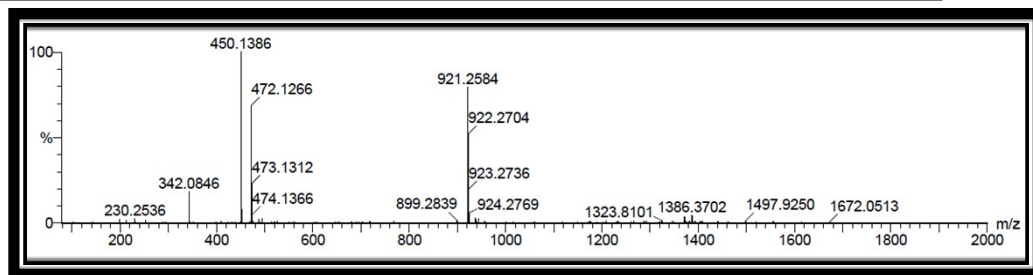

The HRMS spectrum of benzyl 8-(2,4-dihydroxyquinoline-3-carbonyl)-1-naphthoate (**5f**)

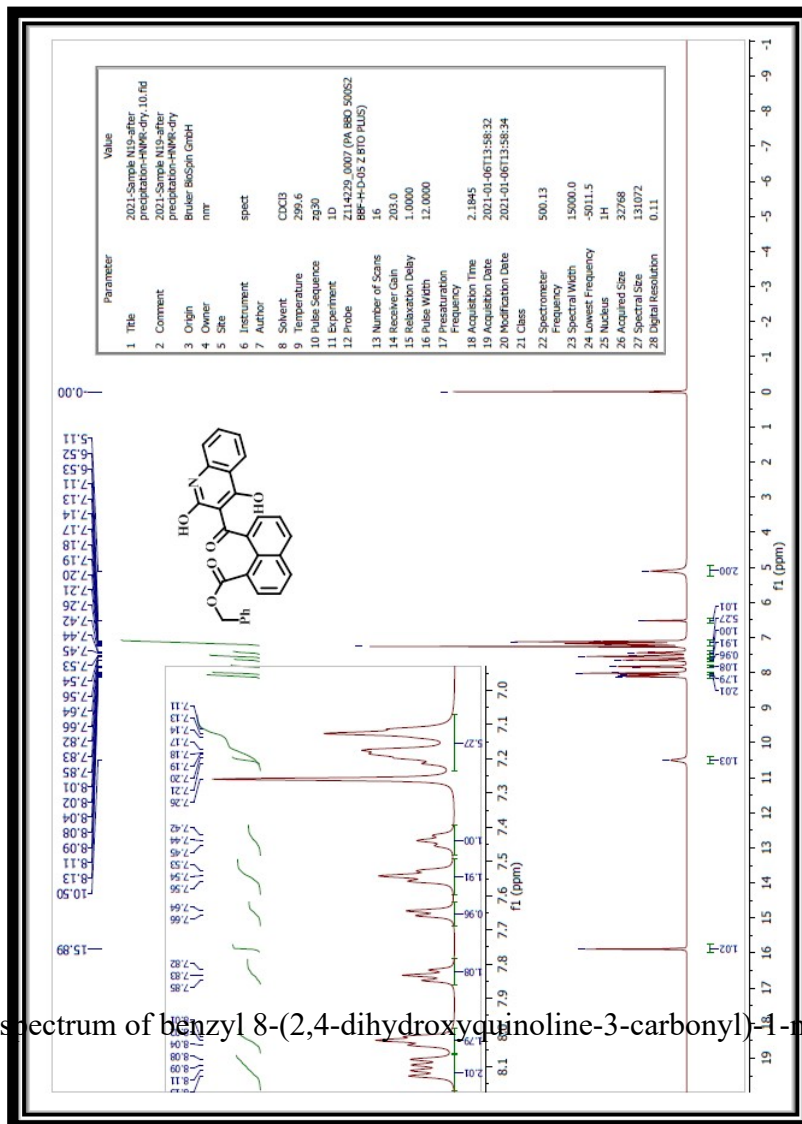

The  $^1\text{H}$ NMR spectrum of benzyl 8-(2,4-dihydroxyquinoline-3-carbonyl)-1-naphthoate (**5f**)

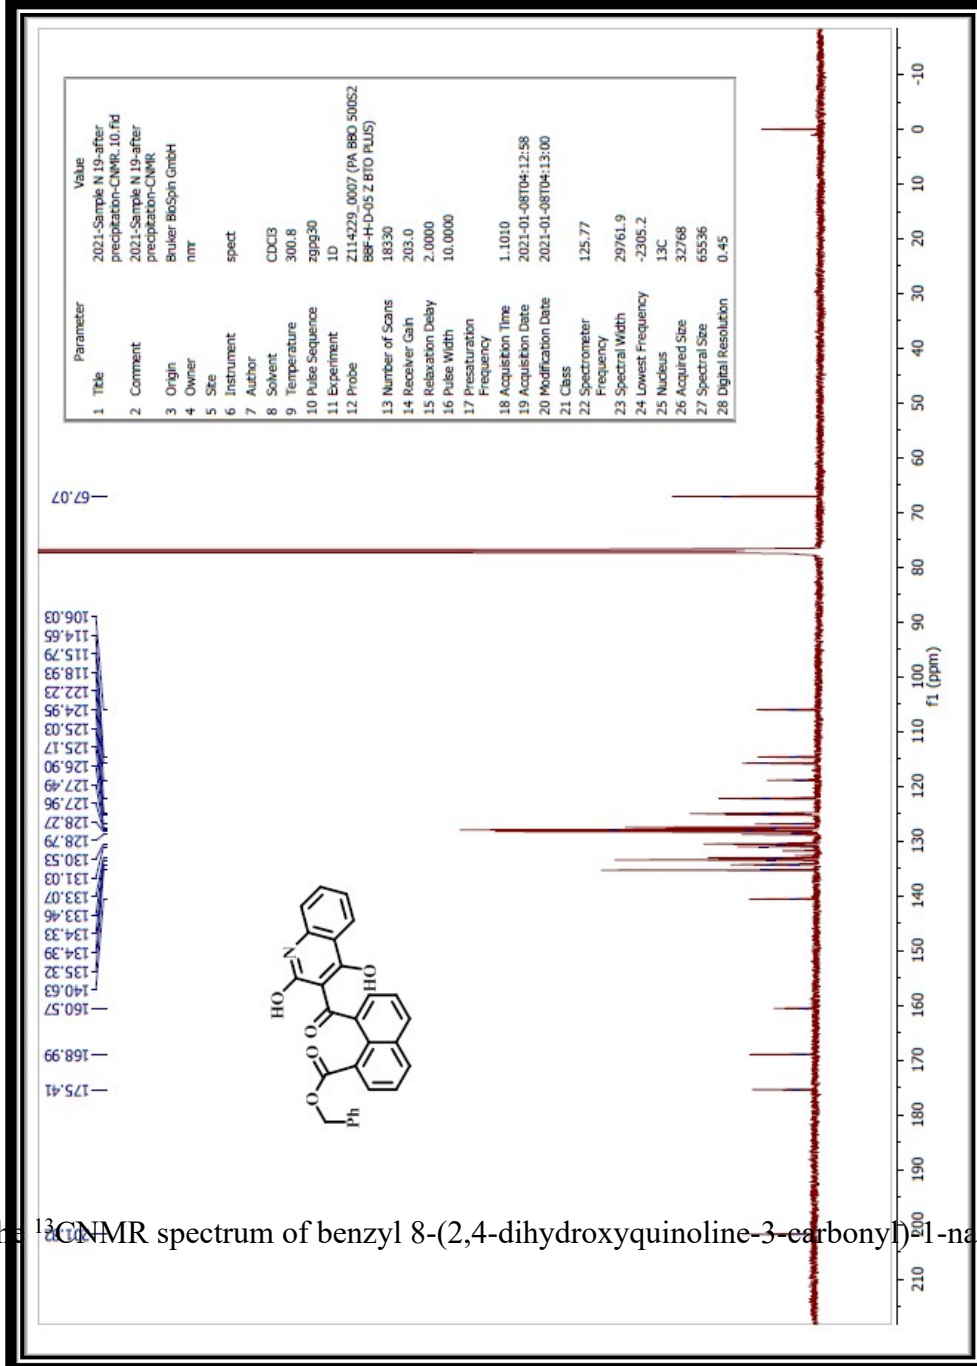

The <sup>13</sup>C NMR spectrum of benzyl 8-(2,4-dihydroxyquinoline-3-carbonyl)-1-naphthoate (**5f**)

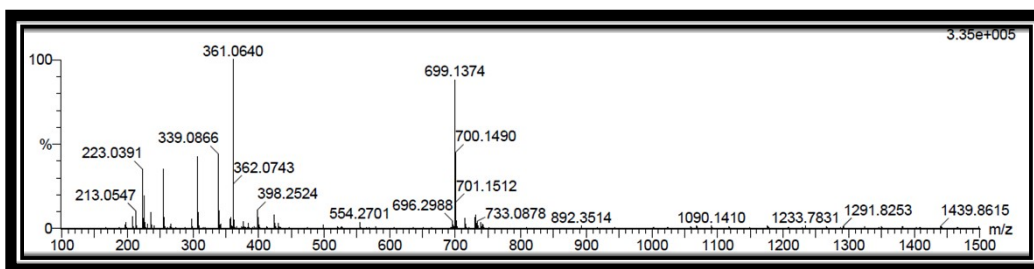

The HRMS spectrum of methyl 8-(4-hydroxy-6-methyl-2-oxo-2H-pyran-3-carbonyl)-1-naphthoate (**5g**)



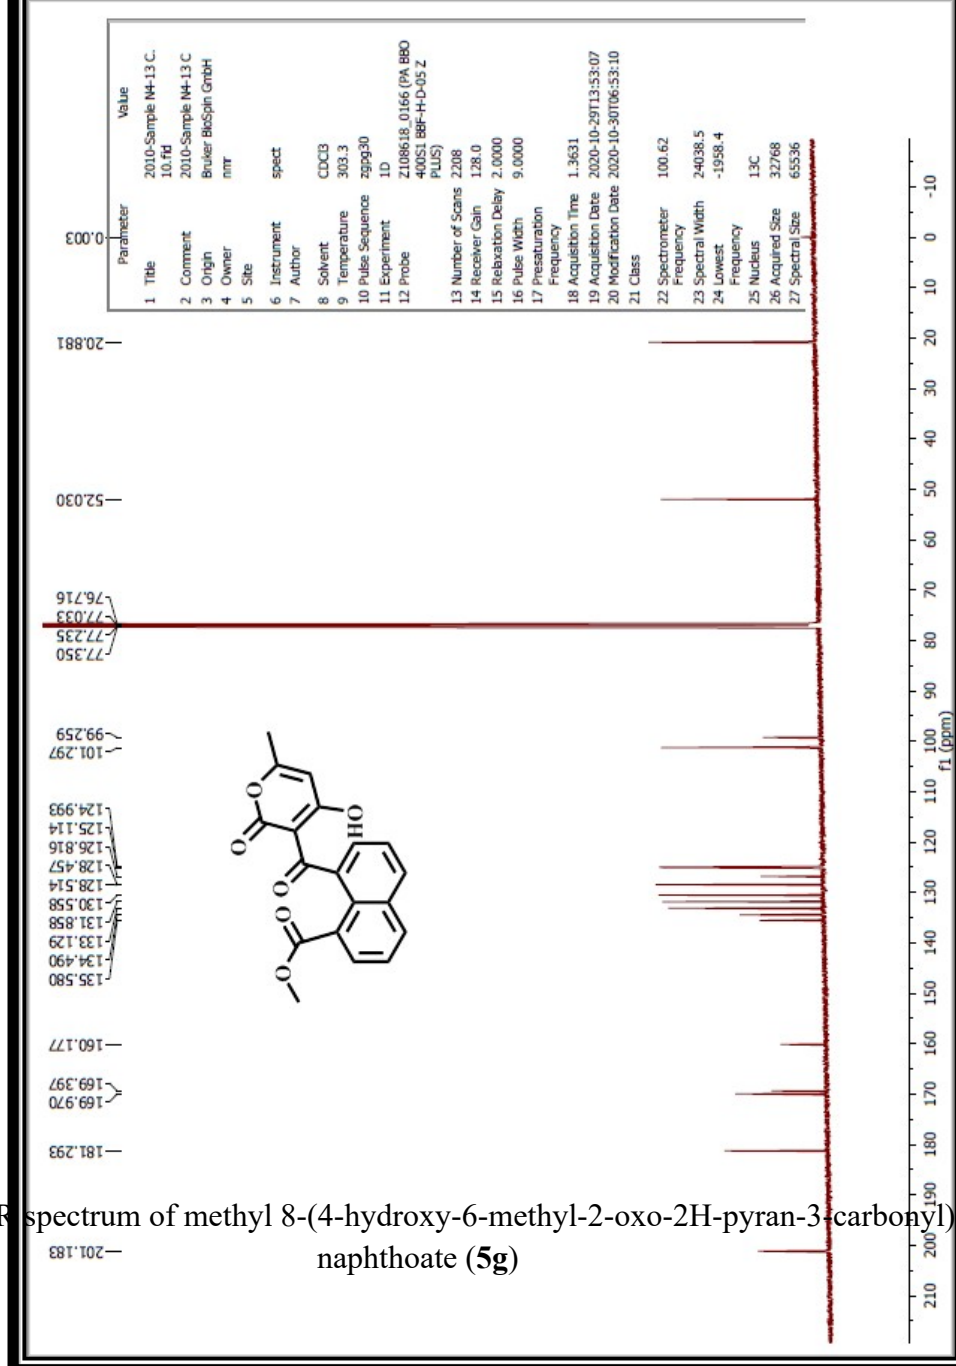

The <sup>13</sup>C NMR spectrum of methyl 8-(4-hydroxy-6-methyl-2-oxo-2H-pyran-3-carbonyl)-1-naphthoate (**5g**)

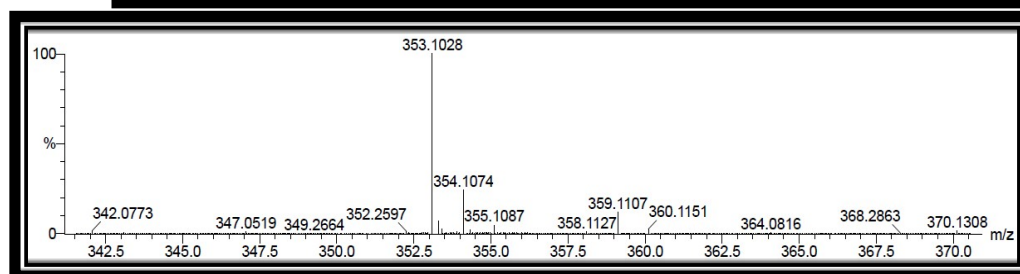

The HRMS spectrum of ethyl 8-(4-hydroxy-6-methyl-2-oxo-2H-pyran-3-carbonyl)-1-naphthoate (**5h**)

The <sup>1</sup>H NMR spectrum of ethyl 8-(4-hydroxy-6-methyl-2-oxo-2H-pyran-3-carbonyl)-1-naphthoate (**5h**)

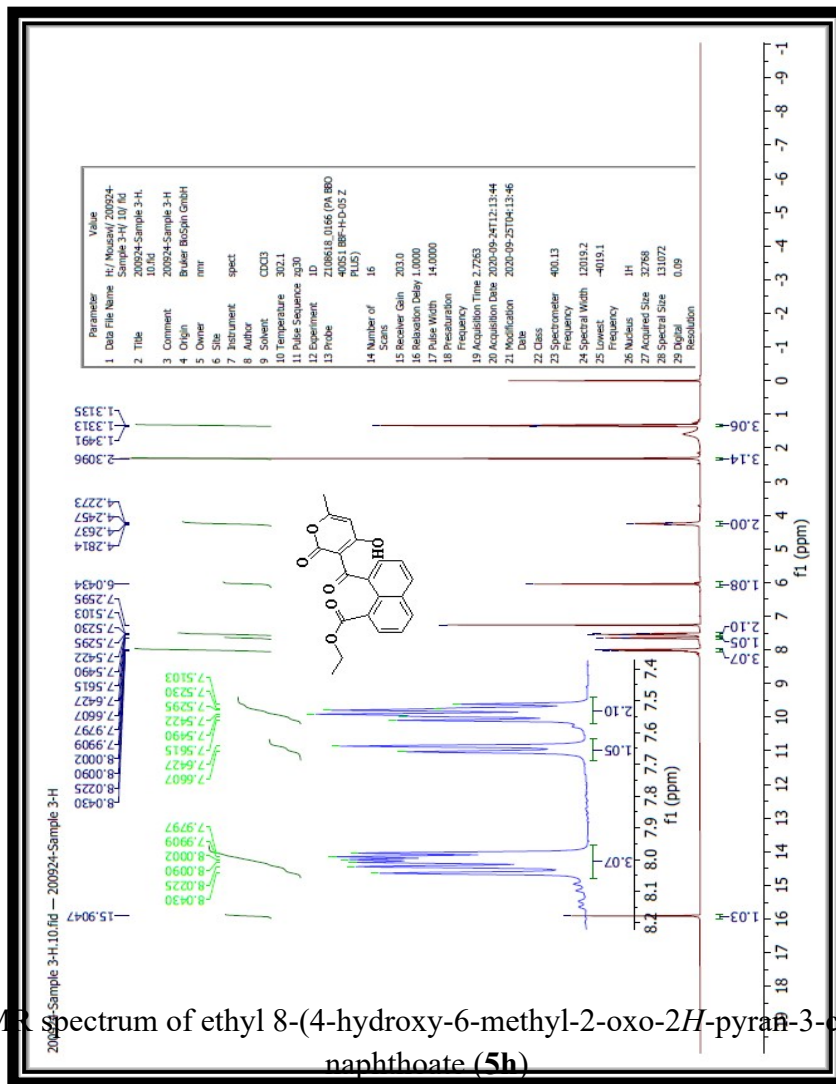

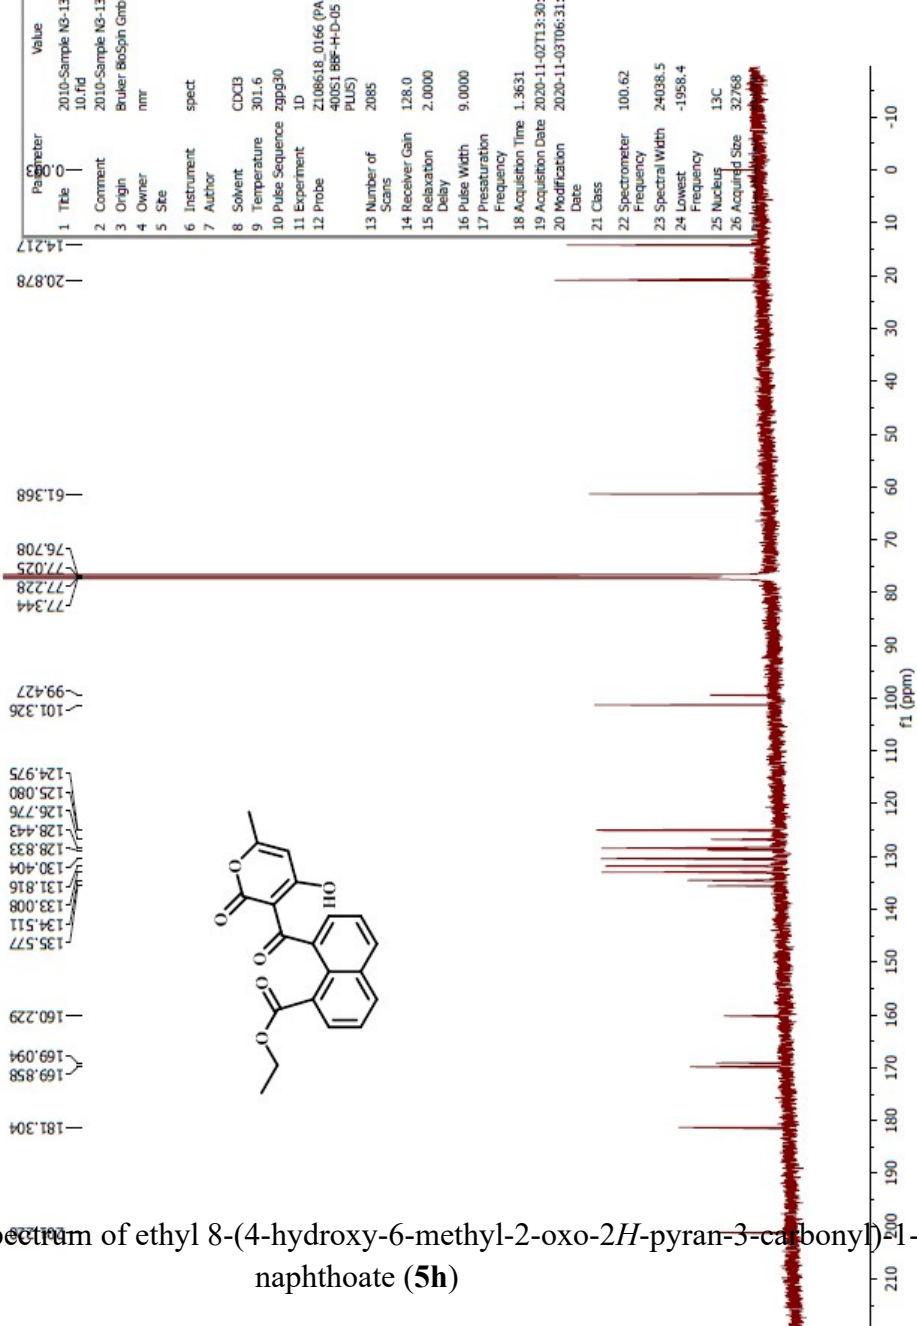

The  $^{13}\text{C}$  NMR spectrum of ethyl 8-(4-hydroxy-6-methyl-2-oxo-2H-pyran-3-carbonyl)-1-naphthoate (**5h**)

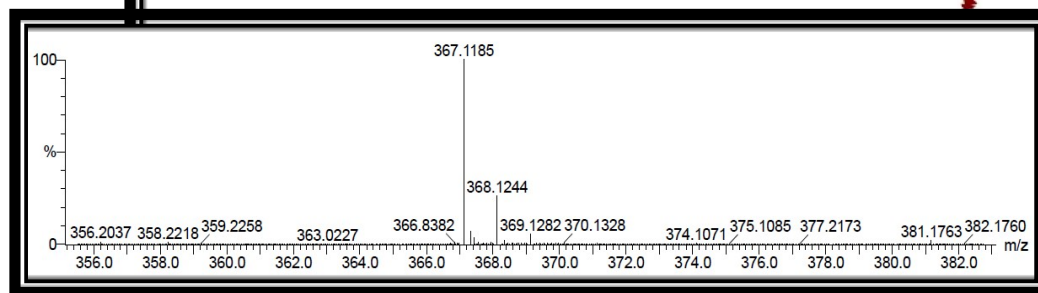

The HRMS spectrum of propyl 8-(4-hydroxy-6-methyl-2-oxo-2H-pyran-3-carbonyl)-1-naphthoate (**5i**)

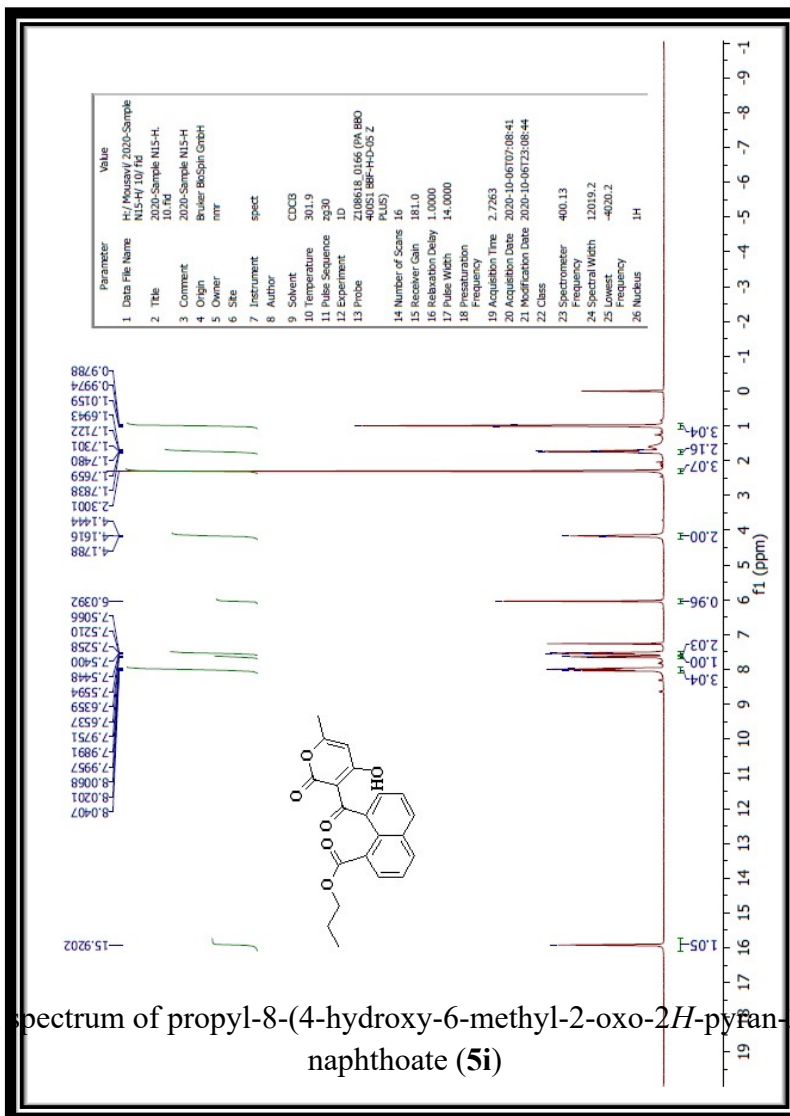

The <sup>1</sup>H NMR spectrum of propyl-8-(4-hydroxy-6-methyl-2-oxo-2H-pyran-1-carbonyl)-1-naphthoate (**5i**)



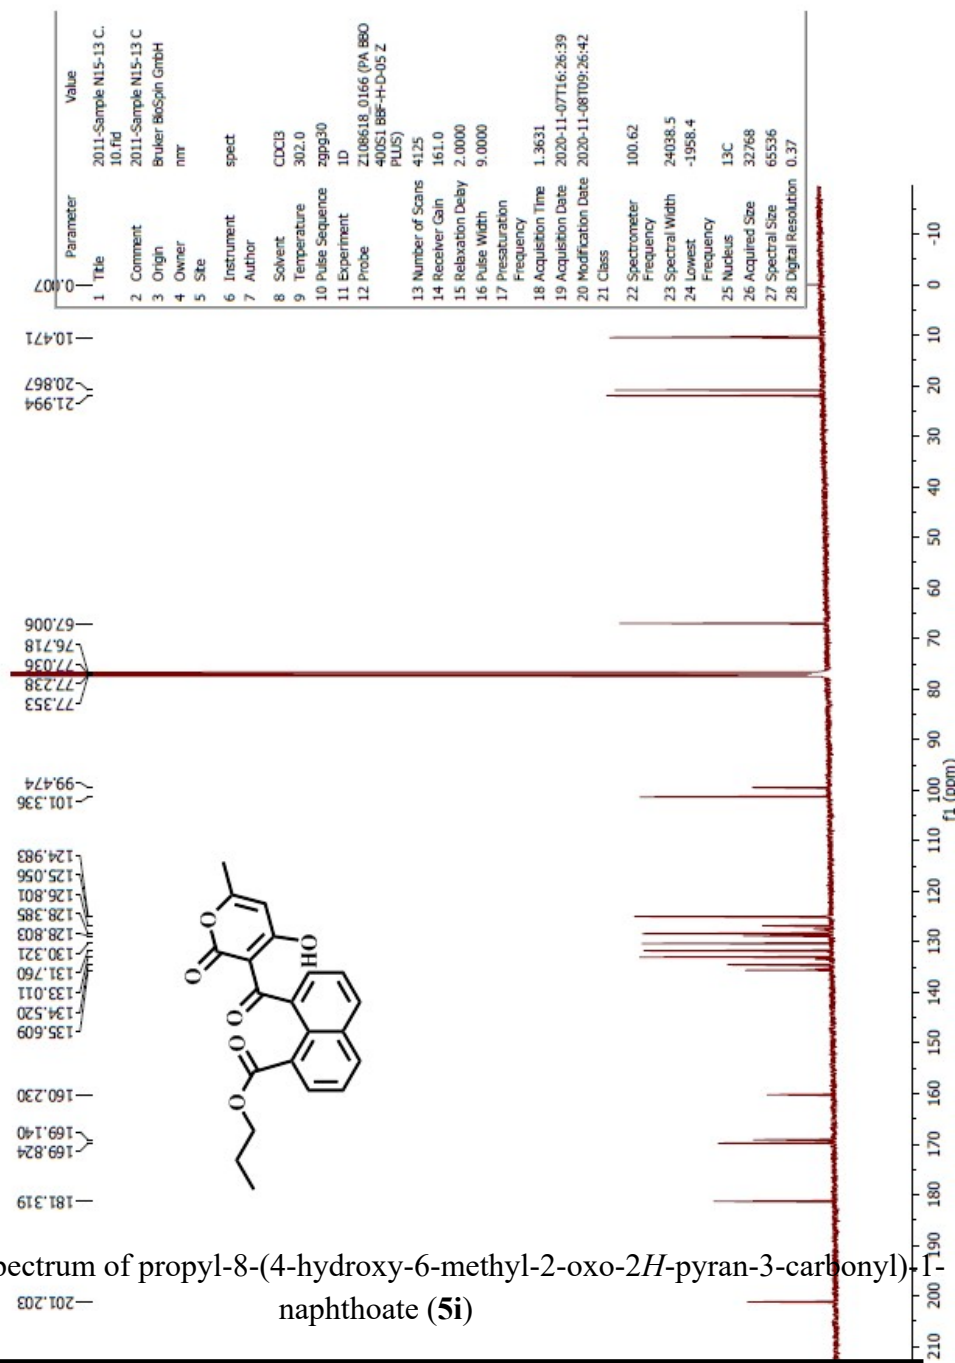

The <sup>1</sup>H NMR spectrum of propyl-8-(4-hydroxy-6-methyl-2-oxo-2*H*-pyran-3-carbonyl)-1-naphthoate (**5i**)

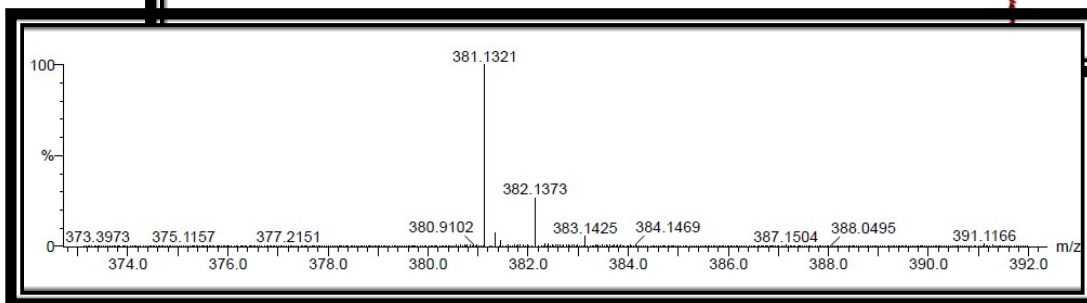

The HRMS spectrum of butyl 8-(4-hydroxy-6-methyl-2-oxo-2*H*-pyran-3-carbonyl)-1-naphthoate (**5j**)

The  $^1\text{H NMR}$  spectrum of butyl 8-(4-hydroxy-6-methyl-2-oxo-2*H*-pyran-3-carbonyl)-1-naphthoate (**5j**)

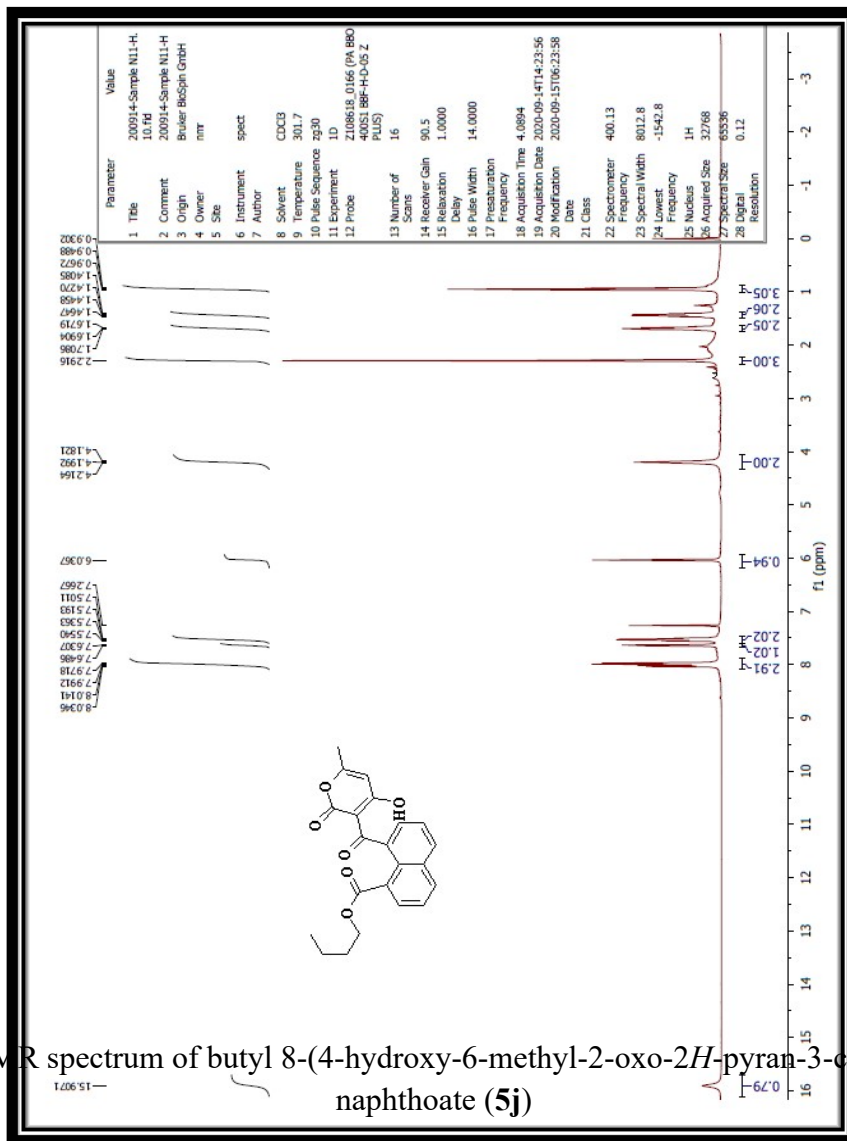

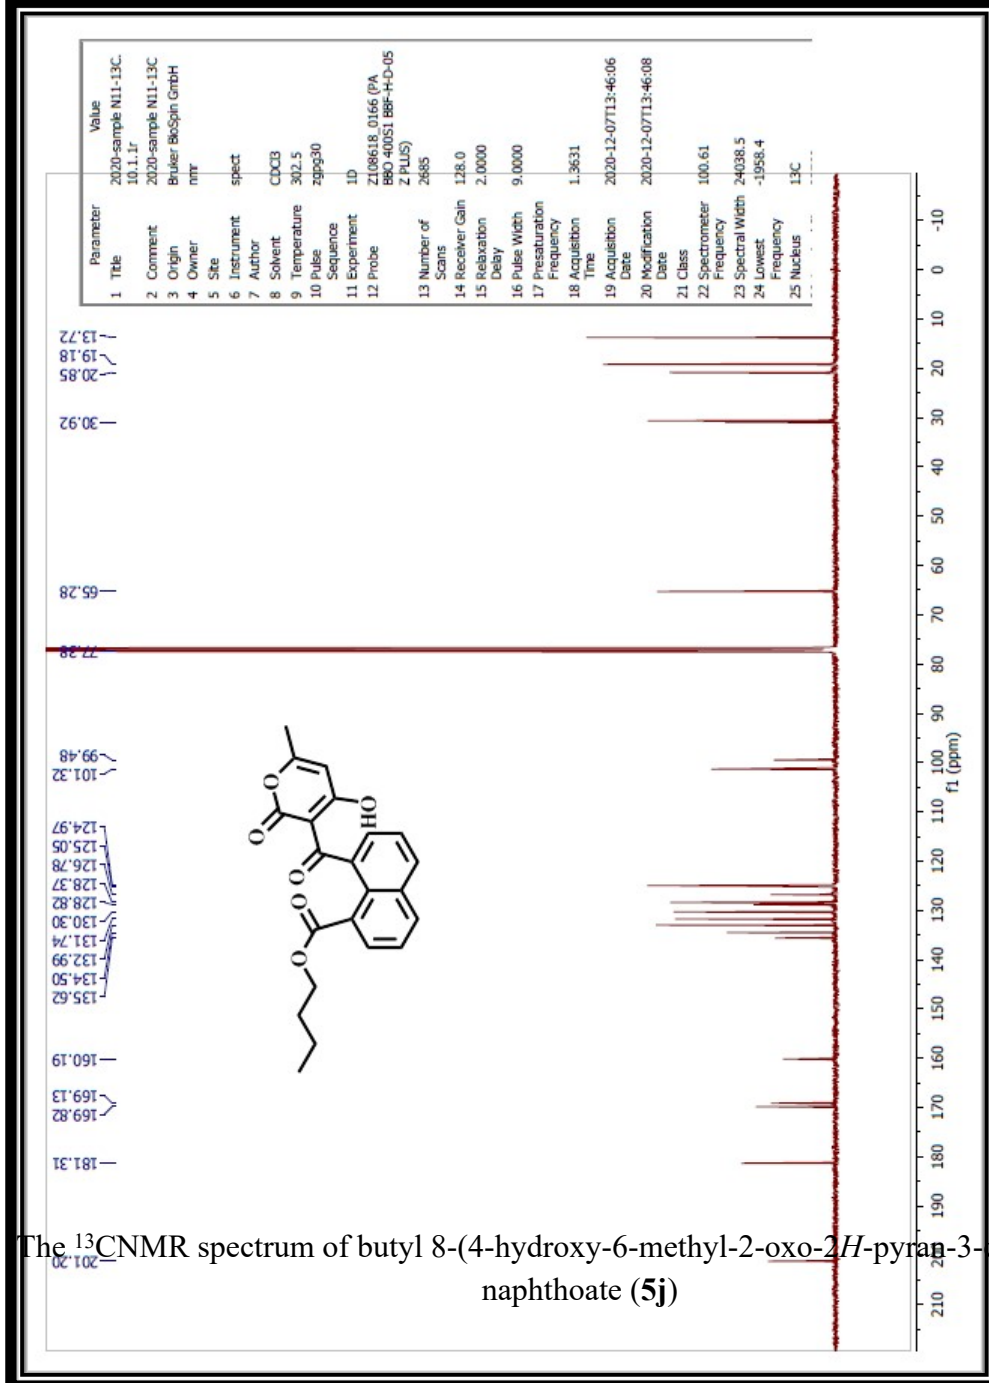

The <sup>13</sup>C NMR spectrum of butyl 8-(4-hydroxy-6-methyl-2-oxo-2H-pyran-3-carbonyl)-1-naphthoate (**5j**)

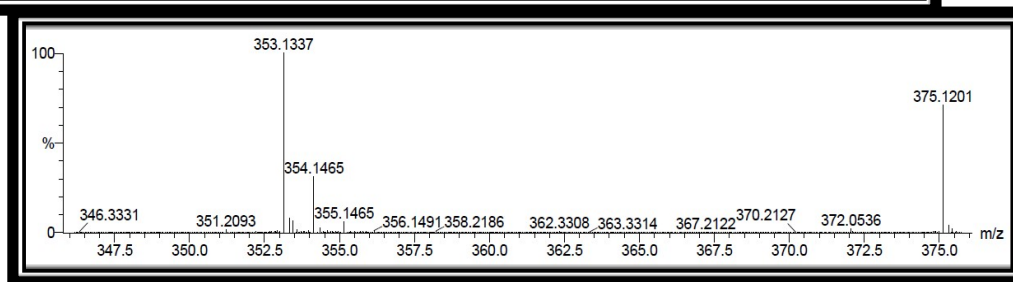

The HRMS spectrum of methyl 8-(2-hydroxy-4,4-dimethyl-6-oxocyclohex-1-ene-1-carbonyl)-1-naphthoate (**5k**)

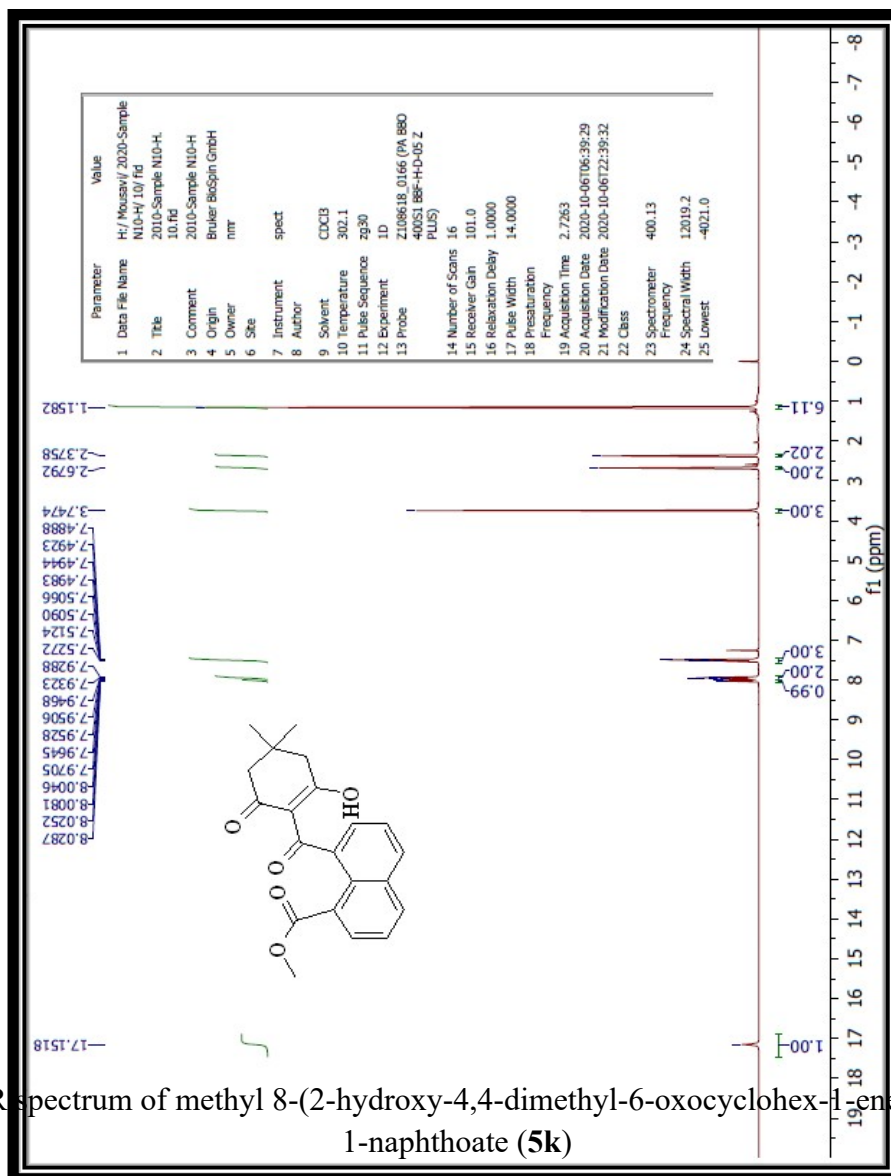

The  $^1\text{H}$ NMR spectrum of methyl 8-(2-hydroxy-4,4-dimethyl-6-oxocyclohex-1-en-1-carbonyl)-1-naphthoate (**5k**)

The <sup>13</sup>CNMR spectrum of methyl 8-(2-hydroxy-4,4-dimethyl-6-oxocyclohex-1-ene-1-carbonyl)-1-naphthoate (**5k**)

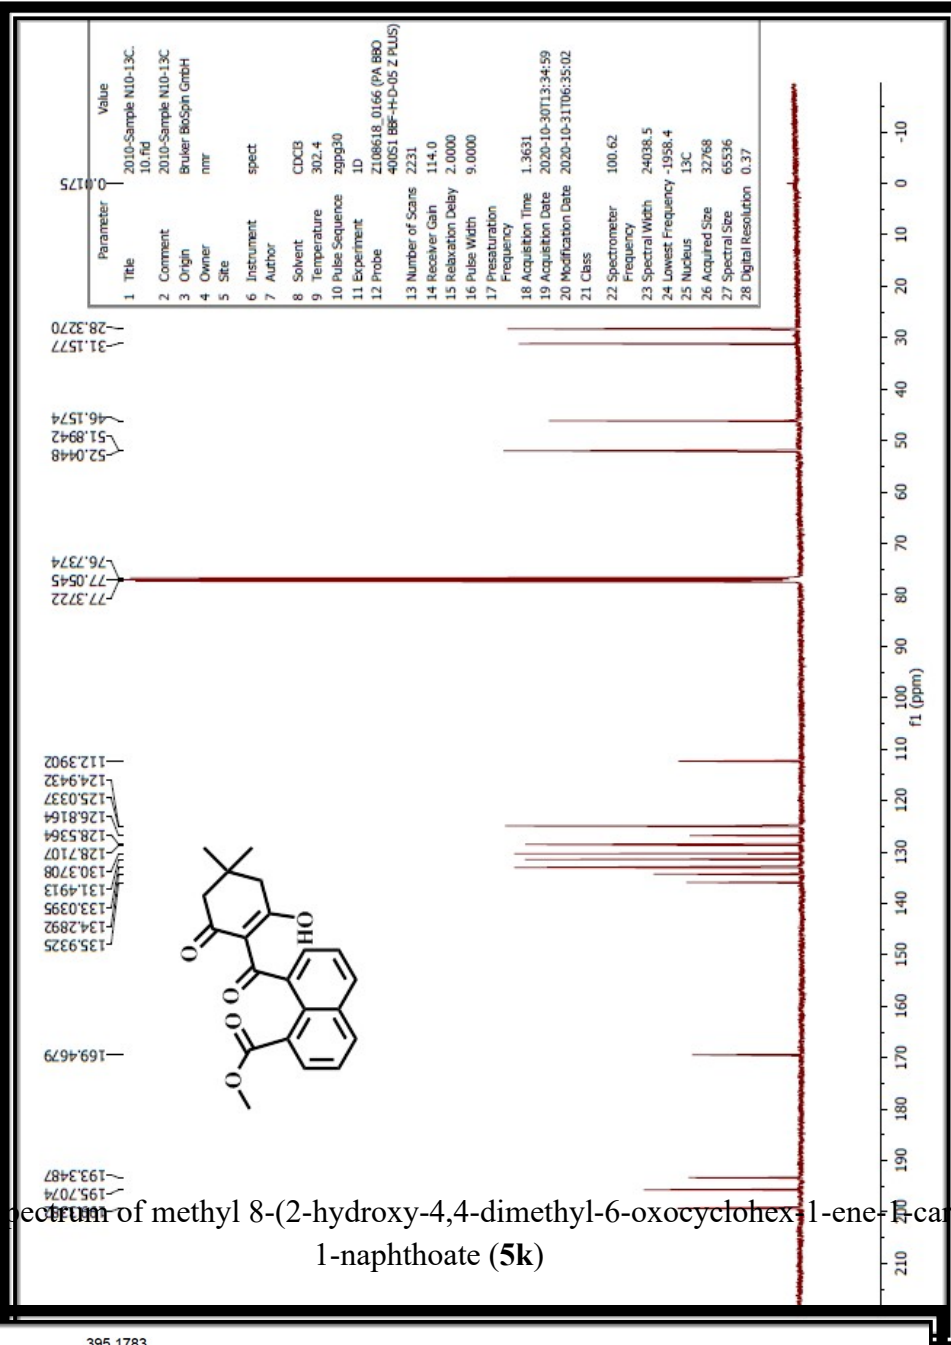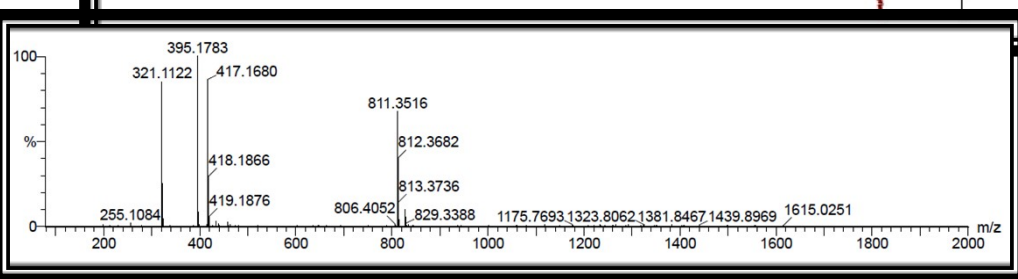

The HRMS spectrum of butyl 8-(2-hydroxy-4,4-dimethyl-6-oxocyclohex-1-ene-1-carbonyl)-1-naphthoate (**5l**)



The <sup>13</sup>C NMR spectrum of butyl 8-(2-hydroxy-4,4-dimethyl-6-oxocyclohex-1-en-1-carbonyl)-1-naphthoate (**51**)

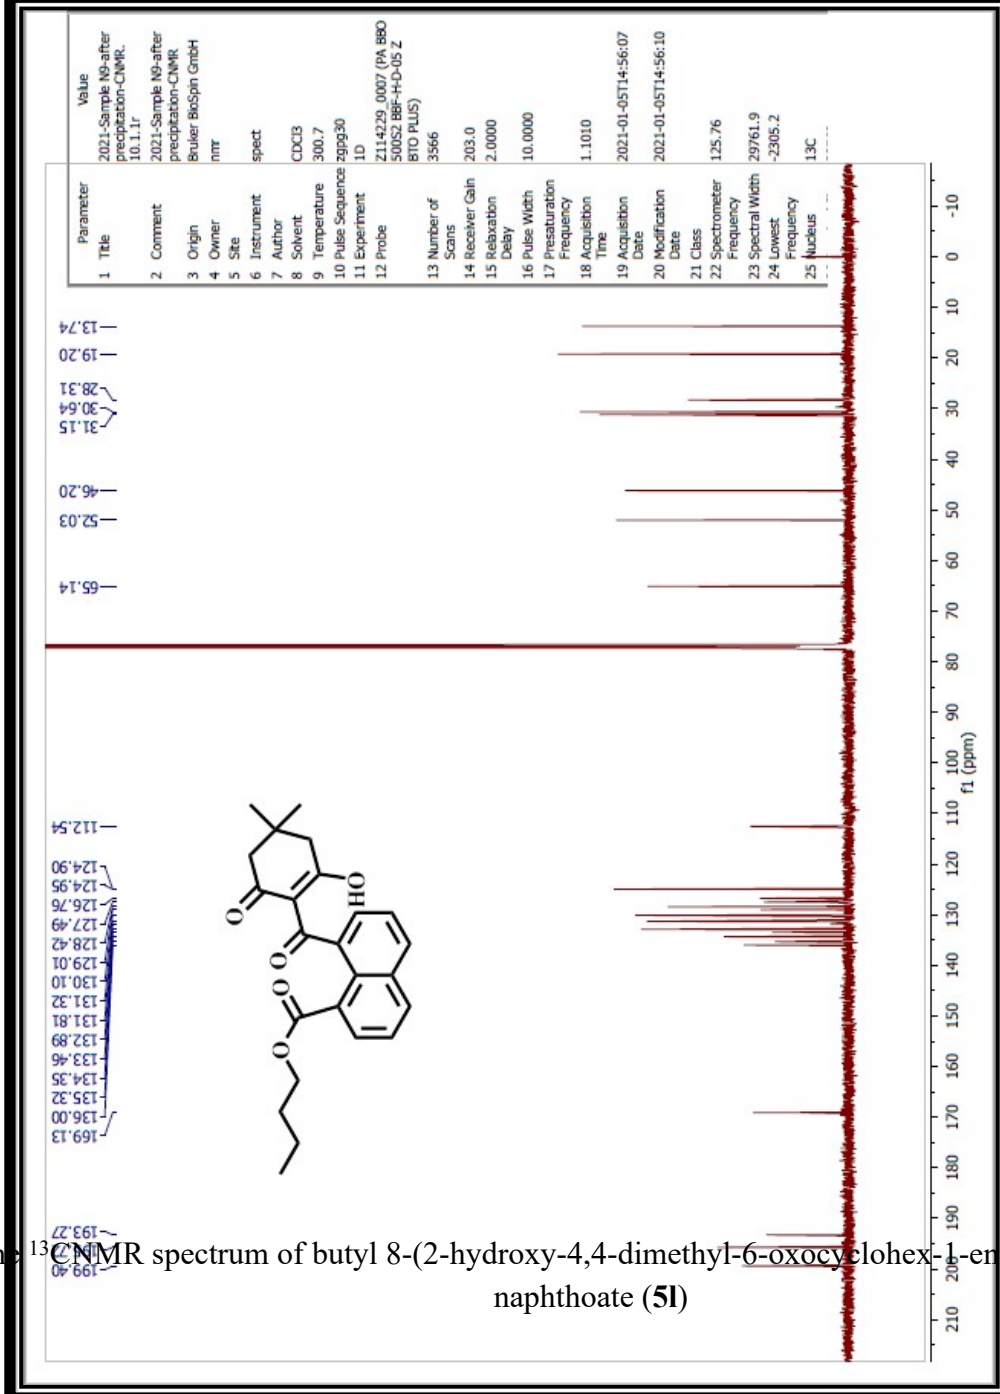

Supplement: d1ra07092d1.pdf [file d1ra07092d1.pdf]
